# Supplementary material for: On brain atlas choice and automatic segmentation methods: a comparison of MAPER & FreeSurfer using three atlas databases
Source: PubMed Central journal article supplement (PMC7028906; doi:10.1038/s41598-020-57951-6), 2020-02-18

## Supplementary Material

### On brain atlas choice and automatic segmentation methods: a comparison of MAPER & FreeSurfer using three atlas databases

S.N. Yaakub, R.A. Heckemann, S.S. Keller, C.J. McGinnity, B. Weber, A. Hammers

#### METHODS

Supplementary Methods: Masking to achieve compatibility between HM and the other atlases.....2

#### TABLES

##### Atlas database details

|                                                                                              |   |
|----------------------------------------------------------------------------------------------|---|
| Supplementary Table A1. Summary of atlas databases. ....                                     | 2 |
| Supplementary Table A2. List of 95 cortical and sub-cortical labels for HM atlas. ....       | 3 |
| Supplementary Table A3. List of 62 cortical labels for DKT40 atlas. ....                     | 4 |
| Supplementary Table A4. List of 132 cortical and sub-cortical labels for MGC2012 atlas. .... | 5 |

##### Summary statistics of atlas properties

|                                                                           |   |
|---------------------------------------------------------------------------|---|
| Supplementary Table B1. Region properties in HM atlas database. ....      | 6 |
| Supplementary Table B2. Region properties in DKT atlas database. ....     | 8 |
| Supplementary Table B3. Region properties in MGC2012 atlas database. .... | 9 |

##### Leave-one-out cross-comparison results: Jaccard overlaps

|                                                                            |    |
|----------------------------------------------------------------------------|----|
| Supplementary Table C1. Jaccard overlap comparisons in HM atlas. ....      | 11 |
| Supplementary Table C2. Jaccard overlap comparisons in DKT atlas. ....     | 13 |
| Supplementary Table C3. Jaccard overlap comparisons in MGC2012 atlas. .... | 14 |

##### Comparisons of group differences in region volumes for ADNI data

|                                                                                |    |
|--------------------------------------------------------------------------------|----|
| Supplementary Table D1. Group differences for the HM atlas database. ....      | 16 |
| Supplementary Table D2. Group differences for the DKT40 atlas database. ....   | 18 |
| Supplementary Table D3. Group differences for the MGC2012 atlas database. .... | 20 |

##### Comparisons of group differences in region volumes for HS data

|                                                                                           |    |
|-------------------------------------------------------------------------------------------|----|
| Supplementary Table E1. Group differences for the HM atlas database (left HS). ....       | 23 |
| Supplementary Table E2. Group differences for the DKT40 atlas database (left HS). ....    | 25 |
| Supplementary Table E3. Group differences for the MGC2012 atlas database (left HS). ....  | 27 |
| Supplementary Table E4. Group differences for the HM atlas database (right HS). ....      | 30 |
| Supplementary Table E5. Group differences for the DKT40 atlas database (right HS). ....   | 32 |
| Supplementary Table E6. Group differences for the MGC2012 atlas database (right HS). .... | 34 |

#### FIGURES

|                                                                                           |    |
|-------------------------------------------------------------------------------------------|----|
| Supplementary Figure S1. Boxplots of Jaccard overlaps for the HM atlas database. ....     | 37 |
| Supplementary Figure S2. Boxplots of Jaccard overlaps for the DKT40 atlas database. ....  | 38 |
| Supplementary Figure S3. Boxplots of Jaccard overlap for the MGC2012 atlas database. .... | 39 |

## Supplementary Methods: Masking to achieve compatibility between HM and the other atlases

We carried out brain extraction in five steps: 1) binarizing the manually generated labels to generate Mask A for later use, 2) generating a brain mask with FSL BET on each full image with -f and -g parameters optimized per subject to achieve visually satisfactory masking, 3) eroding the result of Step 2 in four iterations to generate Mask B, 4) combining Mask A and Mask B using Boolean OR, 5) multiplying the MR image with the mask resulting from Step 4.

**Supplementary Table A1.** Summary of atlas databases.

|                              | <b>HM</b>               | <b>DKT40</b>                                                               | <b>MGC2012</b>      |
|------------------------------|-------------------------|----------------------------------------------------------------------------|---------------------|
| <b>Scanner</b>               | 1.5T GE Signa Echospeed | n=19: 1.5T Siemens Vision<br>n=11: 3T Philips Achieva<br>n=10: 3T Phillips | 1.5T Siemens Vision |
| <b>Sequence</b>              | 3D Cor IR-SPGR          | n=19: 3D Sag MP-RAGE<br>n=11: 3D Sag MP-RAGE<br>n=10: 3D Unknown           | 3D Sag MP-RAGE      |
| <b>Voxel Size (mm)</b>       | 0.9375×0.9375×1.5       | n=19: 1×1×1.25<br>n=11: 1×1×1.2<br>n=10: 1×1×1                             | 1×1×1.25            |
| <b>Number of Regions</b>     | 95                      | 62                                                                         | 138                 |
| <b>Atlas Voxel Size (mm)</b> | 0.9375×0.9375×0.9375    | n=29: 1×1×1<br>n=11: 1×1×1.2                                               | 1×1×1               |
| <b>Number of Subjects</b>    | 30                      | 40                                                                         | 30                  |
| <b>Age Range (mean ± SD)</b> | 20–54 (31.0 ± 7.8)      | 19–61 (26.4 ± 7.3)                                                         | 18–90 (34.3 ± 20.7) |
| <b>Gender (F/M)</b>          | 15/15                   | 20/20                                                                      | 20/10               |
| <b>Handedness (R/L)</b>      | 25/5                    | 37/1 <sup>†</sup>                                                          | 30/0                |

Cor: coronal, Sag: sagittal, IR-SPGR: inversion recovery prepared fast spoiled gradient recall sequence, MP-RAGE: magnetization prepared rapid gradient-echo.

<sup>†</sup>2 unknown handedness

**Supplementary Table A2.** List of 95 cortical and sub-cortical labels for HM atlas.

Abbreviations: L = left, R = right, gyr. = gyrus, cort. = cortex, ant. = anterior, post. = posterior, sup. = superior, inf. = inferior, med. = medial, lat. = lateral, temp. = temporal.

| No. | Region Name                |    |                              |    |                               |
|-----|----------------------------|----|------------------------------|----|-------------------------------|
| 1   | hippocampus R              | 24 | cingulate gyrus, ant. L      | 48 | lat. ventricle, temp. horn L  |
| 2   | hippocampus L              | 25 | cingulate gyrus, ant. R      | 49 | third ventricle               |
| 3   | amygdala R                 | 26 | cingulate gyrus, post. L     | 50 | precentral gyr. L             |
| 4   | amygdala L                 | 27 | cingulate gyrus, post. R     | 51 | precentral gyr. R             |
| 5   | ant. temp. lobe, med. R    | 28 | middle frontal gyr. L        | 52 | straight gyr. L               |
| 6   | ant. temp. lobe, med. L    | 29 | middle frontal gyr. R        | 53 | straight gyr. R               |
| 7   | ant. temp. lobe, lat. R    | 30 | post. temp. lobe L           | 54 | ant. orbital gyr. L           |
| 8   | ant. temp. lobe, lat. L    | 31 | post. temp. lobe R           | 55 | ant. orbital gyr. R           |
| 9   | parahippocampal gyr. R     | 32 | angular gyr. L               | 56 | inf. frontal gyr. L           |
| 10  | parahippocampal gyr. L     | 33 | angular gyr. R               | 57 | inf. frontal gyr. R           |
| 11  | sup. temp. gyr., post. R   | 34 | caudate nucleus L            | 58 | sup. frontal gyr. L           |
| 12  | sup. temp. gyr., post. L   | 35 | caudate nucleus R            | 59 | sup. frontal gyr. R           |
| 13  | middle & inf. temp. gyr. R | 36 | nucleus accumbens L          | 60 | postcentral gyr. L            |
| 14  | middle & inf. temp. gyr. L | 37 | nucleus accumbens R          | 61 | postcentral gyr. R            |
| 15  | fusiform gyr. R            | 38 | putamen L                    | 62 | sup. parietal gyr. L          |
| 16  | fusiform gyr. L            | 39 | putamen R                    | 63 | sup. parietal gyr. R          |
| 17  | cerebellum R               | 40 | thalamus L                   | 64 | lingual gyr. L                |
| 18  | cerebellum L               | 41 | thalamus R                   | 65 | lingual gyr. R                |
| 19  | brainstem                  | 42 | pallidum L                   | 66 | cuneus L                      |
| 20  | insula, post. long gyr. L  | 43 | pallidum R                   | 67 | cuneus R                      |
| 21  | insula, post. long gyr. R  | 44 | corpus callosum              | 68 | med. orbital gyr. L           |
| 22  | occipital lobe L           | 45 | lat. ventricle, main R       | 69 | med. orbital gyr. R           |
| 23  | occipital lobe R           | 46 | lat. ventricle, main L       | 70 | lat. orbital gyr. L           |
|     |                            | 47 | lat. ventricle, temp. horn R | 71 | lat. orbital gyr. R           |
|     |                            |    |                              | 72 | post. orbital gyr. L          |
|     |                            |    |                              | 73 | post. orbital gyr. R          |
|     |                            |    |                              | 74 | substantia nigra L            |
|     |                            |    |                              | 75 | substantia nigra R            |
|     |                            |    |                              | 76 | subgenual frontal cort. L     |
|     |                            |    |                              | 77 | subgenual frontal cort. R     |
|     |                            |    |                              | 78 | subcallosal area L            |
|     |                            |    |                              | 79 | subcallosal area R            |
|     |                            |    |                              | 80 | pre-subgenual frontal cort. L |
|     |                            |    |                              | 81 | pre-subgenual frontal cort. R |
|     |                            |    |                              | 82 | sup. temp. gyr., ant. L       |
|     |                            |    |                              | 83 | sup. temp. gyr., ant. R       |
|     |                            |    |                              | 84 | supramarginal gyr. L          |
|     |                            |    |                              | 85 | supramarginal gyr. R          |
|     |                            |    |                              | 86 | insula, ant. short gyr. L     |
|     |                            |    |                              | 87 | insula, ant. short gyr. R     |
|     |                            |    |                              | 88 | insula, middle short gyr. L   |
|     |                            |    |                              | 89 | insula, middle short gyr. R   |
|     |                            |    |                              | 90 | insula, post. short gyr. L    |
|     |                            |    |                              | 91 | insula, post. short gyr. R    |
|     |                            |    |                              | 92 | insula, ant. inf. cort. L     |
|     |                            |    |                              | 93 | insula, ant. inf. cort. R     |
|     |                            |    |                              | 94 | insula, ant. long gyr. L      |
|     |                            |    |                              | 95 | insula, ant. long gyr. R      |

**Supplementary Table A3.** List of 62 cortical labels for DKT40 atlas.

Abbreviations: L = left, R = right, gyr. = gyrus, cort. = cortex, ant. = anterior, post. = posterior, sup. = superior, inf. = inferior, med. = medial, lat. = lateral, temp. = temporal.

| No. | Region Name                    | No. | Region Name                    |
|-----|--------------------------------|-----|--------------------------------|
| 1   | cingulate gyr., caudal ant. L  | 32  | cingulate gyr., caudal ant. R  |
| 2   | middle frontal gyr., caudal L  | 33  | middle frontal gyr., caudal R  |
| 3   | cuneus L                       | 34  | cuneus R                       |
| 4   | entorhinal cort. L             | 35  | entorhinal cort. R             |
| 5   | fusiform gyr. L                | 36  | fusiform gyr. R                |
| 6   | inf. parietal gyr. L           | 37  | inf. parietal gyr. R           |
| 7   | inf. temp. gyr. L              | 38  | inf. temp. gyr. R              |
| 8   | cingulate gyr., isthmus L      | 39  | cingulate gyr., isthmus R      |
| 9   | lat. occipital lobe L          | 40  | lat. occipital lobe R          |
| 10  | lat. orbitofrontal L           | 41  | lat. orbitofrontal R           |
| 11  | lingual gyr. L                 | 42  | lingual gyr. R                 |
| 12  | med. orbitofrontal L           | 43  | med. orbitofrontal R           |
| 13  | middle temp. gyr. L            | 44  | middle temp. gyr. R            |
| 14  | parahippocampal gyr. L         | 45  | parahippocampal gyr. R         |
| 15  | paracentral gyr. L             | 46  | paracentral gyr. R             |
| 16  | pars opercularis L             | 47  | pars opercularis R             |
| 17  | pars orbitalis L               | 48  | pars orbitalis R               |
| 18  | pars triangularis L            | 49  | pars triangularis R            |
| 19  | pericalcarine cort. L          | 50  | pericalcarine cort. R          |
| 20  | postcentral gyr. L             | 51  | postcentral gyr. R             |
| 21  | cingulate gyr., post. L        | 52  | cingulate gyr., post. R        |
| 22  | precentral gyr. L              | 53  | precentral gyr. R              |
| 23  | precuneus L                    | 54  | precuneus R                    |
| 24  | cingulate gyr., rostral ant. L | 55  | cingulate gyr., rostral ant. R |
| 25  | middle frontal gyr., rostral L | 56  | middle frontal gyr., rostral R |
| 26  | sup. frontal gyr. L            | 57  | sup. frontal gyr. R            |
| 27  | sup. parietal gyr. L           | 58  | sup. parietal gyr. R           |
| 28  | sup. temp. gyr. L              | 59  | sup. temp. gyr. R              |
| 29  | supramarginal gyr. L           | 60  | supramarginal gyr. R           |
| 30  | transverse temp. gyr. L        | 61  | transverse temp. gyr. R        |
| 31  | insula cort. L                 | 62  | insula cort. R                 |

**Supplementary Table A4.** List of 132 cortical and sub-cortical labels for MGC2012 atlas.

Abbreviations: L = left, R = right, gyr. = gyrus, cort. = cortex, ant. = anterior, post. = posterior, sup. = superior, inf. = inferior, med. = medial, lat. = lateral, temp. = temporal.

|            |                           |    |                           |    |                           |     |                                |     |                                 |
|------------|---------------------------|----|---------------------------|----|---------------------------|-----|--------------------------------|-----|---------------------------------|
| <b>No.</b> | <b>Region Name</b>        | 30 | ventral diencephalon L    | 57 | gyrus rectus R            | 87  | occipital fusiform gyr. R      | 115 | sup. frontal gyr. R             |
| 1          | third ventricle           | 31 | optic chiasm              | 58 | gyrus rectus L            | 88  | occipital fusiform gyr. L      | 116 | sup. frontal gyr. L             |
| 2          | fourth ventricle          | 32 | cerebellar vermal lobules | 59 | inf. occipital gyr. R     | 89  | inf. frontal gyr., opercular R | 117 | supplementary motor cort. R     |
| 3          | accumbens area R          |    | I-V                       | 60 | inf. occipital gyr. L     |     |                                |     |                                 |
| 4          | accumbens area L          | 33 | cerebellar vermal lobules | 61 | inf. temp. gyr. R         | 90  | inf. frontal gyr., opercular L | 118 | supplementary motor cort. L     |
| 5          | amygdala R                |    | VI-VII                    | 62 | inf. temp. gyr. L         |     |                                |     |                                 |
| 6          | amygdala L                | 34 | cerebellar vermal lobules | 63 | lingual gyr. R            | 91  | inf. frontal gyr., orbital R   | 119 | supramarginal gyr. R            |
| 7          | brainstem                 |    | VIII-X                    | 64 | lingual gyr. L            | 92  | inf. frontal gyr., orbital L   | 120 | supramarginal gyr. L            |
| 8          | caudate R                 | 35 | cingulate gyrus, ant. R   | 65 | lat. orbital gyr. R       | 93  | cingulate gyrus, post. R       | 121 | sup. occipital gyr. R           |
| 9          | caudate L                 | 36 | cingulate gyrus, ant. L   | 66 | lat. orbital gyr. L       | 94  | cingulate gyrus, post. L       | 122 | sup. occipital gyr. L           |
| 10         | cerebellum exterior R     | 37 | ant. insula R             | 67 | cingulate gyrus, middle R | 95  | precuneus R                    | 123 | sup. parietal lobule R          |
| 11         | cerebellum exterior L     | 38 | ant. insula L             | 68 | cingulate gyrus, middle L | 96  | precuneus L                    | 124 | sup. parietal lobule L          |
| 12         | cerebellar white matter R | 39 | ant. orbital gyr. R       | 69 | med. frontal cort. R      | 97  | parahippocampal gyr. R         | 125 | sup. temp. gyr. R               |
| 13         | cerebellar white matter L | 40 | ant. orbital gyr. L       | 70 | med. frontal cort. L      | 98  | parahippocampal gyr. L         | 126 | sup. temp. gyr. L               |
| 14         | cerebral white matter R   | 41 | angular gyrus R           | 71 | middle frontal gyr. R     | 99  | post. insula R                 | 127 | temporal pole R                 |
| 15         | cerebral white matter L   | 42 | angular gyrus L           | 72 | middle frontal gyr. L     | 100 | post. insula L                 | 128 | temporal pole L                 |
| 16         | cerebrospinal fluid       | 43 | calcarine cort. R         | 73 | middle occipital gyr. R   | 101 | parietal operculum R           | 129 | inf. frontal gyr., triangular R |
| 17         | hippocampus R             | 44 | calcarine cort. L         | 74 | middle occipital gyr. L   | 102 | parietal operculum L           |     |                                 |
| 18         | hippocampus L             | 45 | central operculum R       | 75 | med. orbital gyr. R       | 103 | postcentral gyr. R             | 130 | inf. frontal gyr., triangular L |
| 19         | inf. lateral ventricle R  | 46 | central operculum L       | 76 | med. orbital gyr. L       | 104 | postcentral gyr. L             |     |                                 |
| 20         | inf. lateral ventricle L  | 47 | cuneus R                  | 77 | postcentral gyr., med. R  | 105 | post. orbital gyr. R           | 131 | transverse temp. gyr. R         |
| 21         | lateral ventricle R       | 48 | cuneus L                  | 78 | postcentral gyr., med. L  | 106 | post. orbital gyr. L           | 132 | transverse temp. gyr. L         |
| 22         | lateral ventricle L       | 49 | entorhinal area R         | 79 | precentral gyr., med. R   | 107 | planum polare R                |     |                                 |
| 23         | pallidum R                | 50 | entorhinal area L         | 80 | precentral gyr., med. L   | 108 | planum polare L                |     |                                 |
| 24         | pallidum L                | 51 | frontal operculum R       | 81 | sup. frontal gyr., med. R | 109 | precentral gyr. R              |     |                                 |
| 25         | putamen R                 | 52 | frontal operculum L       | 82 | sup. frontal gyr., med. L | 110 | precentral gyr. L              |     |                                 |
| 26         | putamen L                 | 53 | frontal pole R            | 83 | middle temp. gyr. R       | 111 | planum temporale R             |     |                                 |
| 27         | thalamus (proper) R       | 54 | frontal pole L            | 84 | middle temp. gyr. L       | 112 | planum temporale L             |     |                                 |
| 28         | thalamus (proper) L       | 55 | fusiform gyr. R           | 85 | occipital pole R          | 113 | subcallosal area R             |     |                                 |
| 29         | ventral diencephalon R    | 56 | fusiform gyr. L           | 86 | occipital pole L          | 114 | subcallosal area L             |     |                                 |

**Supplementary Table B1.** Region properties in HM atlas database.

Region volumes (mm<sup>3</sup>), coefficient of variation (CV) and surface-to-volume ratio (SVR) for all subjects in the HM atlas database. Volumes are expressed as a fraction of ICV multiplied by 10<sup>4</sup>. Abbreviations: gyr. = gyrus, cort. = cortex, ant. = anterior, post. = posterior, sup. = superior, inf. = inferior, med. = medial, lat. = lateral, temp. = temporal. np: non-paired regions.

| Region                           | Right Hemisphere      |       |                    | Left Hemisphere       |       |                    |
|----------------------------------|-----------------------|-------|--------------------|-----------------------|-------|--------------------|
|                                  | Volume<br>(mean ± SD) | CV    | SVR<br>(mean ± SD) | Volume<br>(mean ± SD) | CV    | SVR<br>(mean ± SD) |
| <i>Temporal lobe</i>             |                       |       |                    |                       |       |                    |
| hippocampus                      | 13.6 ± 1.79           | 0.132 | 0.81 ± 0.11        | 12.7 ± 1.62           | 0.128 | 0.84 ± 0.09        |
| amygdala                         | 9.35 ± 1.39           | 0.149 | 0.69 ± 0.05        | 9.98 ± 1.91           | 0.191 | 0.67 ± 0.08        |
| ant. temp. lobe, med.            | 27.6 ± 5.95           | 0.216 | 1.11 ± 0.21        | 26.7 ± 4.54           | 0.170 | 1.03 ± 0.17        |
| ant. temp. lobe, lat.            | 14.3 ± 3.88           | 0.271 | 1.27 ± 0.22        | 13.7 ± 3.75           | 0.274 | 1.17 ± 0.17        |
| parahippocampal gyr.             | 18.5 ± 2.40           | 0.130 | 1.25 ± 0.11        | 19.5 ± 2.13           | 0.109 | 1.27 ± 0.11        |
| sup. temp. gyr., post.           | 42.9 ± 5.29           | 0.123 | 1.24 ± 0.09        | 42.9 ± 5.76           | 0.134 | 1.03 ± 0.08        |
| middle & inf. temp. gyr.         | 55.4 ± 6.58           | 0.119 | 1.17 ± 0.13        | 53.1 ± 8.23           | 0.155 | 1.13 ± 0.12        |
| fusiform gyr.                    | 16.1 ± 2.84           | 0.176 | 1.37 ± 0.16        | 17.0 ± 3.47           | 0.205 | 1.24 ± 0.14        |
| post. temp. lobe                 | 146 ± 16.9            | 0.116 | 1.03 ± 0.08        | 141 ± 19.6            | 0.139 | 1.07 ± 0.09        |
| sup. temp. gyr., ant.            | 19.3 ± 3.81           | 0.198 | 1.21 ± 0.17        | 20.3 ± 4.60           | 0.227 | 1.01 ± 0.14        |
| <i>Insula and cingulate gyri</i> |                       |       |                    |                       |       |                    |
| insula, post. long gyr.          | 7.74 ± 1.49           | 0.192 | 1.26 ± 0.15        | 7.66 ± 1.34           | 0.175 | 1.27 ± 0.11        |
| insula, ant. short gyr.          | 5.96 ± 1.39           | 0.233 | 1.17 ± 0.15        | 6.58 ± 1.05           | 0.160 | 1.19 ± 0.13        |
| insula, middle short gyr.        | 3.60 ± 1.26           | 0.350 | 1.30 ± 0.19        | 3.69 ± 0.83           | 0.224 | 1.36 ± 0.12        |
| insula, post. short gyr.         | 5.85 ± 1.28           | 0.218 | 1.16 ± 0.13        | 5.70 ± 1.37           | 0.239 | 1.18 ± 0.10        |
| insula, ant. inf. cort.          | 8.07 ± 2.45           | 0.304 | 1.28 ± 0.22        | 8.50 ± 2.51           | 0.296 | 1.18 ± 0.18        |
| insula, ant. long gyr.           | 8.34 ± 1.26           | 0.151 | 1.17 ± 0.10        | 8.43 ± 1.45           | 0.172 | 1.16 ± 0.12        |
| cingulate gyrus, ant.            | 27.6 ± 6.96           | 0.252 | 1.06 ± 0.13        | 28.6 ± 7.06           | 0.247 | 1.09 ± 0.14        |
| cingulate gyrus, post.           | 28.7 ± 4.82           | 0.168 | 1.04 ± 0.09        | 28.0 ± 3.61           | 0.129 | 1.12 ± 0.11        |
| <i>Frontal lobe</i>              |                       |       |                    |                       |       |                    |
| middle frontal gyr.              | 122 ± 18.4            | 0.151 | 1.16 ± 0.08        | 128 ± 16.7            | 0.131 | 1.03 ± 0.07        |
| precentral gyr.                  | 84.1 ± 11.2           | 0.133 | 1.25 ± 0.09        | 87.2 ± 8.49           | 0.097 | 1.17 ± 0.09        |
| ant. orbital gyr.                | 21.0 ± 3.82           | 0.182 | 1.27 ± 0.13        | 20.4 ± 3.73           | 0.183 | 1.23 ± 0.13        |
| inf. frontal gyr.                | 56.3 ± 11.3           | 0.200 | 1.13 ± 0.11        | 61.0 ± 11.2           | 0.183 | 1.09 ± 0.09        |
| sup. frontal gyr.                | 161 ± 22.1            | 0.138 | 1.02 ± 0.08        | 160 ± 22.6            | 0.141 | 1.03 ± 0.08        |
| med. orbital gyr.                | 18.5 ± 3.71           | 0.201 | 1.56 ± 0.17        | 19.5 ± 4.25           | 0.218 | 1.50 ± 0.16        |
| lat. orbital gyr.                | 15.3 ± 5.56           | 0.364 | 1.29 ± 0.15        | 14.3 ± 4.89           | 0.342 | 1.36 ± 0.15        |
| post. orbital gyr.               | 17.5 ± 3.16           | 0.181 | 1.22 ± 0.13        | 17.9 ± 3.75           | 0.209 | 1.19 ± 0.15        |
| subgenual frontal cort.          | 3.14 ± 1.15           | 0.366 | 1.48 ± 0.26        | 3.49 ± 1.10           | 0.314 | 1.45 ± 0.27        |
| pre-subgenual frontal cort.      | 3.16 ± 1.49           | 0.471 | 1.42 ± 0.21        | 4.20 ± 1.66           | 0.396 | 1.29 ± 0.19        |
| <i>Occipital lobe</i>            |                       |       |                    |                       |       |                    |
| lingual gyr.                     | 43.8 ± 7.00           | 0.160 | 1.36 ± 0.10        | 43.4 ± 7.41           | 0.171 | 1.33 ± 0.10        |
| cuneus                           | 32.6 ± 4.99           | 0.153 | 1.43 ± 0.12        | 33.7 ± 6.86           | 0.203 | 1.43 ± 0.12        |
| occipital lobe                   | 134 ± 27.5            | 0.205 | 1.16 ± 0.08        | 133 ± 21.7            | 0.163 | 1.17 ± 0.06        |
| <i>Parietal lobe</i>             |                       |       |                    |                       |       |                    |
| straight gyr.                    | 11.9 ± 2.71           | 0.227 | 1.64 ± 0.15        | 10.7 ± 2.22           | 0.208 | 1.57 ± 0.15        |
| postcentral gyr.                 | 70.4 ± 8.09           | 0.115 | 1.42 ± 0.09        | 76.3 ± 7.17           | 0.094 | 1.31 ± 0.09        |
| sup. parietal gyr.               | 123 ± 13.7            | 0.111 | 1.16 ± 0.07        | 121 ± 15.9            | 0.132 | 1.10 ± 0.08        |
| supramarginal gyr.               | 67.4 ± 13.6           | 0.201 | 1.10 ± 0.08        | 74.5 ± 11.8           | 0.158 | 1.03 ± 0.07        |
| angular gyr.                     | 55.5 ± 11.6           | 0.210 | 1.03 ± 0.07        | 52.1 ± 14.9           | 0.285 | 1.06 ± 0.08        |
| <i>Central structures</i>        |                       |       |                    |                       |       |                    |
| caudate nucleus                  | 27.1 ± 3.15           | 0.116 | 0.66 ± 0.03        | 27.3 ± 3.28           | 0.120 | 0.56 ± 0.03        |
| nucleus accumbens                | 2.08 ± 0.39           | 0.188 | 1.18 ± 0.13        | 2.41 ± 0.52           | 0.217 | 1.11 ± 0.09        |
| putamen                          | 29.8 ± 2.58           | 0.086 | 0.56 ± 0.03        | 31.2 ± 2.70           | 0.087 | 0.60 ± 0.03        |

|                                         |             |       |             |             |       |             |
|-----------------------------------------|-------------|-------|-------------|-------------|-------|-------------|
| thalamus                                | 45.8 ± 4.35 | 0.095 | 0.42 ± 0.03 | 47.1 ± 4.62 | 0.098 | 0.43 ± 0.03 |
| pallidum                                | 8.72 ± 1.19 | 0.137 | 0.78 ± 0.07 | 8.77 ± 1.17 | 0.133 | 0.81 ± 0.04 |
| corpus callosum (np)                    | 135 ± 18.7  | 0.139 | 0.56 ± 0.05 |             |       |             |
| substantia nigra                        | 2.44 ± 0.45 | 0.184 | 1.39 ± 0.13 | 2.51 ± 0.41 | 0.163 | 1.27 ± 0.11 |
| subcallosal area                        | 2.09 ± 0.71 | 0.340 | 1.66 ± 0.27 | 2.29 ± 0.80 | 0.348 | 1.60 ± 0.28 |
| <i>Posterior fossa &amp; ventricles</i> |             |       |             |             |       |             |
| cerebellum                              | 460 ± 41.8  | 0.091 | 0.20 ± 0.01 | 461 ± 38.4  | 0.083 | 0.20 ± 0.01 |
| brainstem (np)                          | 160 ± 9.81  | 0.061 | 0.34 ± 0.02 |             |       |             |
| lat. ventricle, main                    | 51.1 ± 22.3 | 0.436 | 0.75 ± 0.17 | 56.2 ± 20.9 | 0.372 | 0.69 ± 0.14 |
| lat. ventricle, temp. horn              | 4.60 ± 0.87 | 0.189 | 1.57 ± 0.19 | 3.86 ± 0.80 | 0.207 | 1.80 ± 0.24 |
| third ventricle (np)                    | 6.68 ± 1.96 | 0.294 | 1.11 ± 0.20 |             |       |             |

**Supplementary Table B2.** Region properties in DKT atlas database.

Region volumes (mm<sup>3</sup>), coefficient of variation (CV) and surface-to-volume ratio (SVR) for all subjects in the DKT40 atlas database. Volumes are expressed as a fraction of ICV multiplied by 10<sup>4</sup>. Abbreviations as in Supp. Table B1.

| Region                           | Right Hemisphere      |       |                    | Left Hemisphere       |       |                    |
|----------------------------------|-----------------------|-------|--------------------|-----------------------|-------|--------------------|
|                                  | Volume<br>(mean ± SD) | CV    | SVR<br>(mean ± SD) | Volume<br>(mean ± SD) | CV    | SVR<br>(mean ± SD) |
| <i>Temporal lobe</i>             |                       |       |                    |                       |       |                    |
| entorhinal cort.                 | 12.0 ± 2.33           | 0.193 | 0.83 ± 0.22        | 12.4 ± 2.35           | 0.190 | 0.84 ± 0.22        |
| parahippocampal gyr.             | 14.0 ± 2.76           | 0.197 | 0.96 ± 0.27        | 15.1 ± 2.80           | 0.185 | 0.93 ± 0.26        |
| sup. temp. gyr.                  | 106 ± 15.4            | 0.144 | 0.82 ± 0.20        | 115 ± 12.6            | 0.110 | 0.73 ± 0.19        |
| middle temp. gyr.                | 94.2 ± 12.3           | 0.131 | 0.82 ± 0.19        | 95.0 ± 15.3           | 0.161 | 0.82 ± 0.20        |
| inf. temp. gyr.                  | 79.7 ± 9.70           | 0.122 | 0.80 ± 0.21        | 80.3 ± 10.7           | 0.133 | 0.83 ± 0.21        |
| fusiform gyr.                    | 56.5 ± 10.2           | 0.181 | 0.92 ± 0.27        | 60.9 ± 11.8           | 0.194 | 0.89 ± 0.26        |
| transverse temp. gyr.            | 7.00 ± 1.30           | 0.186 | 1.16 ± 0.29        | 8.52 ± 2.04           | 0.239 | 1.03 ± 0.27        |
| <i>Insula and cingulate gyri</i> |                       |       |                    |                       |       |                    |
| insula cort.                     | 40.9 ± 4.06           | 0.099 | 0.71 ± 0.25        | 40.7 ± 4.29           | 0.105 | 0.75 ± 0.26        |
| cingulate gyr., rostral ant.     | 20.0 ± 8.06           | 0.404 | 0.94 ± 0.27        | 25.2 ± 7.37           | 0.292 | 0.94 ± 0.27        |
| cingulate gyr., caudal ant.      | 20.3 ± 6.75           | 0.333 | 0.83 ± 0.26        | 22.8 ± 7.34           | 0.322 | 0.89 ± 0.27        |
| cingulate gyr., post.            | 24.6 ± 4.61           | 0.187 | 0.93 ± 0.26        | 26.1 ± 4.79           | 0.183 | 0.99 ± 0.27        |
| cingulate gyr., isthmus          | 16.4 ± 4.14           | 0.252 | 1.03 ± 0.28        | 16.2 ± 3.16           | 0.195 | 1.06 ± 0.29        |
| <i>Frontal lobe</i>              |                       |       |                    |                       |       |                    |
| middle frontal gyr., rostral     | 78.9 ± 13.0           | 0.164 | 0.96 ± 0.22        | 79.4 ± 12.4           | 0.157 | 0.92 ± 0.208       |
| middle frontal gyr., caudal      | 42.9 ± 7.06           | 0.165 | 0.93 ± 0.22        | 47.6 ± 7.79           | 0.164 | 0.85 ± 0.20        |
| sup. frontal gyr.                | 176 ± 23.4            | 0.133 | 0.80 ± 0.22        | 166 ± 22.1            | 0.133 | 0.82 ± 0.22        |
| pars opercularis                 | 33.0 ± 8.76           | 0.265 | 0.93 ± 0.20        | 31.9 ± 10.1           | 0.317 | 0.91 ± 0.20        |
| pars triangularis                | 29.7 ± 7.40           | 0.249 | 0.93 ± 0.21        | 31.0 ± 9.71           | 0.313 | 0.96 ± 0.19        |
| pars orbitalis                   | 16.6 ± 5.59           | 0.336 | 0.94 ± 0.25        | 15.8 ± 5.27           | 0.333 | 1.00 ± 0.25        |
| lat. orbitofrontal               | 57.7 ± 6.76           | 0.117 | 0.88 ± 0.23        | 55.7 ± 8.92           | 0.160 | 0.89 ± 0.26        |
| med. orbitofrontal               | 26.6 ± 4.07           | 0.153 | 1.04 ± 0.33        | 28.3 ± 6.02           | 0.213 | 1.00 ± 0.33        |
| precentral gyr.                  | 88.4 ± 12.0           | 0.136 | 0.89 ± 0.21        | 90.0 ± 11.2           | 0.125 | 0.84 ± 0.19        |
| paracentral gyr.                 | 28.8 ± 4.28           | 0.148 | 0.91 ± 0.28        | 27.7 ± 5.22           | 0.189 | 0.94 ± 0.28        |
| <i>Occipital lobe</i>            |                       |       |                    |                       |       |                    |
| lingual gyr.                     | 48.4 ± 6.83           | 0.141 | 1.06 ± 0.28        | 45.0 ± 10.3           | 0.228 | 1.10 ± 0.31        |
| cuneus                           | 28.5 ± 5.27           | 0.185 | 1.16 ± 0.33        | 29.3 ± 4.97           | 0.170 | 1.17 ± 0.36        |
| lat. occipital lobe              | 81.4 ± 9.56           | 0.117 | 0.99 ± 0.22        | 78.2 ± 9.71           | 0.124 | 0.99 ± 0.23        |
| pericalcarine cort.              | 15.3 ± 2.69           | 0.175 | 1.33 ± 0.31        | 13.8 ± 2.72           | 0.197 | 1.33 ± 0.33        |
| <i>Parietal lobe</i>             |                       |       |                    |                       |       |                    |
| postcentral gyr.                 | 66.0 ± 10.9           | 0.165 | 1.13 ± 0.26        | 71.0 ± 9.64           | 0.136 | 1.02 ± 0.24        |
| sup. parietal gyr.               | 77.4 ± 9.80           | 0.127 | 1.00 ± 0.26        | 72.6 ± 12.0           | 0.165 | 0.94 ± 0.26        |
| supramarginal gyr.               | 71.0 ± 14.1           | 0.199 | 0.90 ± 0.19        | 74.1 ± 13.5           | 0.182 | 0.85 ± 0.18        |
| inf. parietal gyr.               | 92.3 ± 18.4           | 0.200 | 0.86 ± 0.22        | 81.5 ± 16.2           | 0.199 | 0.88 ± 0.22        |
| precuneus                        | 68.9 ± 10.2           | 0.149 | 0.94 ± 0.25        | 65.3 ± 8.32           | 0.127 | 0.92 ± 0.26        |



**Supplementary Table B3.** Region properties in MGC2012 atlas database.

Region volumes (mm<sup>3</sup>), coefficient of variation (CV) and surface-to-volume ratio (SVR) for all subjects in the MGC2012 atlas database. Volumes are expressed as a fraction of ICV multiplied by 10<sup>4</sup>. Abbreviations as in Supp. Table B1.

| Region                           | Right Hemisphere      |       |                    | Left Hemisphere       |       |                    |
|----------------------------------|-----------------------|-------|--------------------|-----------------------|-------|--------------------|
|                                  | Volume<br>(mean ± SD) | CV    | SVR<br>(mean ± SD) | Volume<br>(mean ± SD) | CV    | SVR<br>(mean ± SD) |
| <i>Temporal lobe</i>             |                       |       |                    |                       |       |                    |
| hippocampus                      | 25.1 ± 2.63           | 0.105 | 0.56 ± 0.02        | 23.8 ± 2.60           | 0.109 | 0.62 ± 0.02        |
| amygdala                         | 6.74 ± 1.08           | 0.161 | 0.70 ± 0.05        | 6.62 ± 0.97           | 0.146 | 0.75 ± 0.06        |
| entorhinal area                  | 13.0 ± 3.45           | 0.265 | 0.78 ± 0.07        | 12.9 ± 3.38           | 0.262 | 0.73 ± 0.08        |
| parahippocampal gyr.             | 21.0 ± 3.93           | 0.187 | 0.86 ± 0.06        | 22.5 ± 2.76           | 0.123 | 0.88 ± 0.04        |
| sup. temp. gyr.                  | 56.3 ± 9.04           | 0.160 | 0.77 ± 0.06        | 55.2 ± 12.5           | 0.226 | 0.70 ± 0.05        |
| middle temp. gyr.                | 107 ± 12.4            | 0.116 | 0.64 ± 0.04        | 104 ± 16.6            | 0.159 | 0.64 ± 0.05        |
| inf. temp. gyr.                  | 84.8 ± 11.3           | 0.134 | 0.62 ± 0.04        | 84.3 ± 14.3           | 0.170 | 0.70 ± 0.06        |
| fusiform gyr.                    | 55.1 ± 11.0           | 0.199 | 0.72 ± 0.05        | 55.4 ± 12.0           | 0.217 | 0.73 ± 0.07        |
| transverse temp. gyr.            | 11.5 ± 3.77           | 0.329 | 1.01 ± 0.09        | 12.3 ± 3.82           | 0.309 | 0.90 ± 0.10        |
| temporal pole                    | 59.2 ± 12.0           | 0.202 | 0.60 ± 0.04        | 58.6 ± 11.1           | 0.190 | 0.56 ± 0.04        |
| planum temporale                 | 14.7 ± 4.61           | 0.313 | 1.05 ± 0.09        | 15.8 ± 4.20           | 0.265 | 0.87 ± 0.08        |
| planum polare                    | 15.0 ± 4.62           | 0.308 | 1.06 ± 0.09        | 16.3 ± 4.16           | 0.255 | 0.82 ± 0.05        |
| <i>Insula and cingulate gyri</i> |                       |       |                    |                       |       |                    |
| ant. insula                      | 30.2 ± 2.34           | 0.077 | 0.64 ± 0.03        | 31.1 ± 4.10           | 0.132 | 0.72 ± 0.04        |
| post. insula                     | 16.8 ± 2.20           | 0.131 | 0.77 ± 0.06        | 16.4 ± 2.76           | 0.169 | 0.75 ± 0.06        |
| cingulate gyrus, ant.            | 31.3 ± 8.59           | 0.274 | 0.68 ± 0.04        | 36.4 ± 10.7           | 0.295 | 0.67 ± 0.05        |
| cingulate gyrus, middle          | 35.9 ± 4.79           | 0.133 | 0.72 ± 0.05        | 36.8 ± 7.69           | 0.209 | 0.73 ± 0.07        |
| cingulate gyrus, post.           | 30.7 ± 7.56           | 0.246 | 0.80 ± 0.08        | 33.6 ± 7.26           | 0.216 | 0.82 ± 0.06        |
| <i>Frontal lobe</i>              |                       |       |                    |                       |       |                    |
| middle frontal gyr.              | 141 ± 18.9            | 0.134 | 0.68 ± 0.06        | 144 ± 16.9            | 0.117 | 0.63 ± 0.05        |
| precentral gyr.                  | 96.4 ± 10.2           | 0.106 | 0.76 ± 0.06        | 97.2 ± 14.1           | 0.145 | 0.71 ± 0.06        |
| precentral gyr., med.            | 19.9 ± 5.20           | 0.262 | 0.81 ± 0.08        | 20.5 ± 5.18           | 0.253 | 0.86 ± 0.08        |
| sup. frontal gyr.                | 111 ± 21.4            | 0.194 | 0.70 ± 0.06        | 109 ± 15.3            | 0.140 | 0.73 ± 0.06        |
| sup. frontal gyr., med.          | 59.0 ± 10.9           | 0.185 | 0.69 ± 0.05        | 52.9 ± 13.3           | 0.252 | 0.74 ± 0.07        |
| med. frontal cort.               | 14.2 ± 4.34           | 0.305 | 1.01 ± 0.11        | 14.6 ± 3.62           | 0.247 | 0.89 ± 0.07        |
| inf. frontal gyr., opercular     | 26.3 ± 8.20           | 0.311 | 0.84 ± 0.09        | 25.1 ± 7.43           | 0.296 | 0.83 ± 0.08        |
| inf. frontal gyr., orbital       | 12.3 ± 4.57           | 0.373 | 0.92 ± 0.10        | 11.8 ± 3.92           | 0.332 | 1.05 ± 0.11        |
| inf. frontal gyr., triangular    | 27.5 ± 8.35           | 0.303 | 0.80 ± 0.08        | 29.4 ± 8.33           | 0.283 | 0.84 ± 0.07        |
| frontal operculum                | 14.8 ± 4.16           | 0.281 | 0.82 ± 0.08        | 14.9 ± 4.12           | 0.277 | 1.00 ± 0.09        |
| frontal pole                     | 27.8 ± 11.7           | 0.422 | 0.80 ± 0.14        | 26.0 ± 13.3           | 0.509 | 0.83 ± 0.10        |
| central operculum                | 29.6 ± 7.92           | 0.268 | 0.73 ± 0.05        | 29.8 ± 5.94           | 0.199 | 0.79 ± 0.06        |
| ant. orbital gyr.                | 14.3 ± 4.15           | 0.291 | 0.87 ± 0.08        | 12.0 ± 3.55           | 0.296 | 0.89 ± 0.08        |
| post. orbital gyr.               | 18.0 ± 4.31           | 0.239 | 0.86 ± 0.08        | 19.6 ± 4.99           | 0.254 | 0.85 ± 0.08        |
| med. orbital gyr.                | 31.3 ± 4.83           | 0.154 | 0.84 ± 0.08        | 32.1 ± 6.37           | 0.199 | 0.74 ± 0.06        |
| lat. orbital gyr.                | 17.8 ± 5.04           | 0.283 | 0.88 ± 0.10        | 18.5 ± 5.95           | 0.322 | 0.96 ± 0.09        |
| supplementary motor cort.        | 39.8 ± 8.15           | 0.205 | 0.70 ± 0.05        | 40.8 ± 7.37           | 0.181 | 0.76 ± 0.07        |
| <i>Occipital lobe</i>            |                       |       |                    |                       |       |                    |
| lingual gyr.                     | 61.5 ± 15.3           | 0.249 | 0.79 ± 0.08        | 57.1 ± 14.3           | 0.251 | 0.80 ± 0.10        |
| cuneus                           | 37.8 ± 7.86           | 0.208 | 0.86 ± 0.08        | 35.2 ± 8.75           | 0.249 | 0.85 ± 0.09        |
| sup. occipital gyr.              | 33.6 ± 11.0           | 0.328 | 0.84 ± 0.09        | 27.5 ± 8.63           | 0.314 | 0.87 ± 0.09        |
| middle occipital gyr.            | 41.6 ± 10.2           | 0.246 | 0.71 ± 0.06        | 47.2 ± 12.4           | 0.263 | 0.68 ± 0.07        |
| inf. occipital gyr.              | 50.8 ± 12.4           | 0.245 | 0.76 ± 0.08        | 47.8 ± 12.4           | 0.260 | 0.73 ± 0.09        |
| occipital pole                   | 22.5 ± 10.2           | 0.454 | 0.85 ± 0.16        | 26.4 ± 12.1           | 0.458 | 0.76 ± 0.09        |
| occipital fusiform gyr.          | 31.9 ± 9.06           | 0.284 | 0.84 ± 0.08        | 32.4 ± 10.6           | 0.327 | 0.83 ± 0.10        |
| calcarine cort.                  | 25.6 ± 6.02           | 0.235 | 0.74 ± 0.07        | 25.6 ± 4.90           | 0.191 | 0.74 ± 0.08        |
| <i>Parietal lobe</i>             |                       |       |                    |                       |       |                    |

|                                                       |             |       |             |             |       |             |
|-------------------------------------------------------|-------------|-------|-------------|-------------|-------|-------------|
| gyrus rectus                                          | 16.7 ± 3.98 | 0.239 | 0.95 ± 0.11 | 18.1 ± 3.77 | 0.209 | 0.80 ± 0.09 |
| postcentral gyr.                                      | 78.6 ± 12.0 | 0.153 | 0.88 ± 0.09 | 88.9 ± 17.8 | 0.200 | 0.79 ± 0.08 |
| postcentral gyr., med.                                | 7.90 ± 3.72 | 0.470 | 0.98 ± 0.11 | 8.56 ± 4.81 | 0.562 | 1.05 ± 0.15 |
| sup. parietal lobule                                  | 78.2 ± 10.6 | 0.135 | 0.75 ± 0.07 | 79.2 ± 12.3 | 0.155 | 0.70 ± 0.06 |
| supramarginal gyr.                                    | 63.5 ± 16.1 | 0.253 | 0.73 ± 0.06 | 69.0 ± 16.7 | 0.243 | 0.70 ± 0.06 |
| precuneus                                             | 78.9 ± 10.5 | 0.133 | 0.69 ± 0.06 | 80.0 ± 10.8 | 0.135 | 0.67 ± 0.05 |
| parietal operculum                                    | 17.1 ± 4.90 | 0.287 | 0.86 ± 0.08 | 18.6 ± 4.75 | 0.256 | 0.81 ± 0.10 |
| angular gyrus                                         | 79.7 ± 25.1 | 0.315 | 0.63 ± 0.07 | 70.0 ± 20.1 | 0.288 | 0.66 ± 0.06 |
| <i>Central structures</i>                             |             |       |             |             |       |             |
| caudate                                               | 22.5 ± 2.65 | 0.118 | 0.66 ± 0.06 | 21.9 ± 2.98 | 0.137 | 0.54 ± 0.05 |
| accumbens area                                        | 3.18 ± 0.90 | 0.284 | 1.08 ± 0.16 | 3.54 ± 0.82 | 0.232 | 1.11 ± 0.10 |
| putamen                                               | 30.3 ± 2.90 | 0.095 | 0.50 ± 0.04 | 31.5 ± 3.10 | 0.099 | 0.53 ± 0.04 |
| thalamus (proper)                                     | 52.5 ± 4.68 | 0.089 | 0.36 ± 0.02 | 54.9 ± 5.05 | 0.092 | 0.38 ± 0.02 |
| pallidum                                              | 10.4 ± 1.46 | 0.140 | 0.63 ± 0.09 | 10.3 ± 1.10 | 0.106 | 0.70 ± 0.04 |
| ventral diencephalon                                  | 32.0 ± 2.39 | 0.075 | 0.51 ± 0.03 | 33.7 ± 2.53 | 0.075 | 0.51 ± 0.03 |
| optic chiasm (np)                                     | 0.57 ± 0.21 | 0.362 | 1.85 ± 0.38 |             |       |             |
| subcallosal area                                      | 9.00 ± 3.54 | 0.393 | 0.89 ± 0.12 | 8.98 ± 4.09 | 0.455 | 0.93 ± 0.14 |
| <i>Posterior fossa, ventricles &amp; white matter</i> |             |       |             |             |       |             |
| cerebellum exterior                                   | 350 ± 28.2  | 0.080 | 0.33 ± 0.02 | 350 ± 28.5  | 0.082 | 0.34 ± 0.02 |
| cerebellar vermal lobules I-V (np)                    | 33.4 ± 7.74 | 0.232 | 0.54 ± 0.09 |             |       |             |
| cerebellar vermal lobules VI-VII (np)                 | 16.0 ± 3.90 | 0.243 | 0.69 ± 0.07 |             |       |             |
| cerebellar vermal lobules VIII-X (np)                 | 19.8 ± 3.34 | 0.169 | 0.59 ± 0.06 |             |       |             |
| brainstem                                             | 123 ± 11.2  | 0.091 | 0.32 ± 0.01 |             |       |             |
| lateral ventricle                                     | 61.8 ± 44.7 | 0.724 | 0.62 ± 0.19 | 74.4 ± 54.3 | 0.731 | 0.58 ± 0.18 |
| inf. lateral ventricle                                | 3.10 ± 1.43 | 0.462 | 1.45 ± 0.29 | 2.63 ± 1.41 | 0.536 | 1.73 ± 0.41 |
| third ventricle (np)                                  | 5.85 ± 3.98 | 0.680 | 1.10 ± 0.30 |             |       |             |
| fourth ventricle (np)                                 | 12.3 ± 3.67 | 0.297 | 0.92 ± 0.12 |             |       |             |
| cerebrospinal fluid (np)                              | 7.09 ± 1.86 | 0.262 | 0.92 ± 0.08 |             |       |             |
| cerebral white matter                                 | 1450 ± 121  | 0.084 | 0.44 ± 0.03 | 1430 ± 119  | 0.083 | 0.44 ± 0.03 |
| cerebellar white matter                               | 95.8 ± 13.8 | 0.144 | 0.52 ± 0.04 | 98.0 ± 10.9 | 0.112 | 0.54 ± 0.04 |

**Supplementary Table C1.** Jaccard overlap comparisons in HM atlas.

Leave-one-out cross-comparison results for MAPER and FreeSurfer segmentation of the Hammers\_mith atlas. The mean JC (across 30 subjects) for each region is shown, with significant differences in JC between MAPER and FreeSurfer (from Welch's two-tailed paired t-test, after adjustment for 93 multiple comparisons) shown in bold. Abbreviations as in Supp. Table B1.

| Region                           | Right hemisphere |              | Left hemisphere |              |
|----------------------------------|------------------|--------------|-----------------|--------------|
|                                  | MAPER            | FreeSurfer   | MAPER           | FreeSurfer   |
| <i>Temporal lobe</i>             |                  |              |                 |              |
| hippocampus                      | <b>0.728</b>     | 0.664        | <b>0.712</b>    | 0.643        |
| amygdala                         | <b>0.667</b>     | 0.628        | 0.662           | 0.626        |
| ant. temp. lobe, med.            | <b>0.793</b>     | 0.707        | <b>0.797</b>    | 0.693        |
| ant. temp. lobe, lat.            | <b>0.682</b>     | 0.520        | <b>0.677</b>    | 0.452        |
| parahippocampal gyr.             | 0.722            | 0.758        | 0.705           | <b>0.767</b> |
| sup. temp. gyr., post.           | 0.838            | 0.802        | <b>0.845</b>    | 0.803        |
| middle & inf. temp. gyr.         | 0.826            | 0.783        | <b>0.808</b>    | 0.731        |
| fusiform gyr.                    | <b>0.676</b>     | 0.580        | <b>0.648</b>    | 0.535        |
| post. temp. lobe                 | <b>0.762</b>     | 0.709        | <b>0.778</b>    | 0.715        |
| sup. temp. gyr., ant.            | 0.762            | 0.726        | 0.775           | 0.713        |
| <i>Insula and cingulate gyri</i> |                  |              |                 |              |
| insula, post. long gyr.          | <b>0.755</b>     | 0.709        | <b>0.748</b>    | 0.695        |
| insula, ant. short gyr.          | <b>0.730</b>     | 0.669        | <b>0.753</b>    | 0.669        |
| insula, middle short gyr.        | <b>0.625</b>     | 0.531        | <b>0.682</b>    | 0.545        |
| insula, post. short gyr.         | <b>0.753</b>     | 0.628        | <b>0.737</b>    | 0.598        |
| insula, ant. inf. cort.          | <b>0.690</b>     | 0.637        | <b>0.697</b>    | 0.640        |
| insula, ant. long gyr.           | <b>0.760</b>     | 0.627        | <b>0.744</b>    | 0.634        |
| cingulate gyrus, ant.            | 0.778            | 0.780        | 0.721           | 0.721        |
| cingulate gyrus, post.           | 0.750            | 0.771        | 0.787           | 0.799        |
| <i>Frontal lobe</i>              |                  |              |                 |              |
| middle frontal gyr.              | 0.793            | 0.796        | 0.787           | 0.784        |
| precentral gyr.                  | 0.775            | 0.766        | 0.770           | 0.766        |
| ant. orbital gyr.                | 0.722            | 0.702        | 0.675           | 0.645        |
| inf. frontal gyr.                | 0.780            | 0.759        | 0.778           | 0.760        |
| sup. frontal gyr.                | 0.830            | 0.837        | 0.821           | 0.822        |
| med. orbital gyr.                | 0.633            | 0.604        | <b>0.628</b>    | 0.563        |
| lat. orbital gyr.                | 0.490            | 0.465        | 0.438           | 0.440        |
| post. orbital gyr.               | 0.708            | 0.678        | 0.680           | 0.645        |
| subgenual frontal cort.          | <b>0.666</b>     | 0.573        | <b>0.688</b>    | 0.559        |
| pre-subgenual frontal cort.      | 0.552            | 0.497        | 0.598           | 0.514        |
| <i>Occipital lobe</i>            |                  |              |                 |              |
| lingual gyr.                     | 0.733            | <b>0.778</b> | 0.759           | 0.802        |
| cuneus                           | 0.750            | 0.773        | 0.747           | 0.753        |
| occipital lobe                   | 0.725            | 0.729        | 0.746           | 0.738        |
| <i>Parietal lobe</i>             |                  |              |                 |              |
| straight gyr.                    | 0.719            | 0.692        | 0.704           | 0.650        |
| postcentral gyr.                 | 0.765            | 0.748        | 0.776           | 0.781        |
| sup. parietal gyr.               | 0.820            | 0.826        | 0.817           | 0.837        |
| supramarginal gyr.               | 0.718            | 0.690        | 0.779           | 0.753        |
| angular gyr.                     | 0.595            | 0.558        | 0.645           | 0.595        |
| <i>Central structures</i>        |                  |              |                 |              |
| caudate nucleus                  | <b>0.813</b>     | 0.743        | <b>0.809</b>    | 0.740        |
| nucleus accumbens                | 0.521            | 0.490        | 0.550           | 0.502        |

|                                         |              |       |              |       |
|-----------------------------------------|--------------|-------|--------------|-------|
| putamen                                 | <b>0.815</b> | 0.752 | <b>0.809</b> | 0.753 |
| thalamus                                | 0.803        | 0.783 | <b>0.806</b> | 0.776 |
| pallidum                                | 0.668        | 0.617 | <b>0.667</b> | 0.623 |
| corpus callosum (np)                    | <b>0.770</b> | 0.718 |              |       |
| substantia nigra                        | <b>0.588</b> | 0.526 | <b>0.586</b> | 0.501 |
| <i>Posterior fossa &amp; ventricles</i> |              |       |              |       |
| cerebellum                              | <b>0.930</b> | 0.892 | <b>0.933</b> | 0.892 |
| brainstem (np)                          | <b>0.883</b> | 0.840 |              |       |
| lat. ventricle, main                    | <b>0.818</b> | 0.734 | <b>0.835</b> | 0.752 |
| lat. ventricle, temp. horn              | <b>0.529</b> | 0.434 | <b>0.493</b> | 0.396 |
| third ventricle (np)                    | <b>0.711</b> | 0.641 |              |       |

**Supplementary Table C2.** Jaccard overlap comparisons in DKT atlas.

Leave-one-out cross-comparison results for MAPER and FreeSurfer segmentation of the Desikan-Killiany-Tourville 40 atlas. The mean JC (across 30 subjects) for each region is shown, with significant differences in JC between MAPER and FreeSurfer (from Welch's two-tailed paired t-test, after adjustment for 62 multiple comparisons) shown in bold. Abbreviations as in Supp. Table B1.

| Region                           | Right hemisphere |              | Left hemisphere |              |
|----------------------------------|------------------|--------------|-----------------|--------------|
|                                  | MAPER            | FreeSurfer   | MAPER           | FreeSurfer   |
| <i>Temporal lobe</i>             |                  |              |                 |              |
| entorhinal cort.                 | 0.534            | <b>0.605</b> | 0.546           | <b>0.644</b> |
| parahippocampal gyr.             | 0.631            | <b>0.750</b> | 0.651           | <b>0.749</b> |
| sup. temp. gyr.                  | 0.706            | <b>0.792</b> | 0.703           | <b>0.802</b> |
| middle temp. gyr.                | 0.657            | <b>0.776</b> | 0.637           | <b>0.749</b> |
| inf. temp. gyr.                  | 0.598            | <b>0.736</b> | 0.592           | <b>0.713</b> |
| fusiform gyr.                    | 0.615            | <b>0.705</b> | 0.605           | <b>0.693</b> |
| transverse temp. gyr.            | 0.635            | <b>0.722</b> | 0.612           | <b>0.704</b> |
| <i>Insula and cingulate gyri</i> |                  |              |                 |              |
| insula cort.                     | 0.750            | <b>0.821</b> | 0.758           | <b>0.812</b> |
| cingulate gyr., rostral ant.     | 0.567            | 0.610        | 0.604           | 0.621        |
| cingulate gyr., caudal ant.      | 0.621            | 0.684        | 0.593           | 0.622        |
| cingulate gyr., post.            | 0.644            | <b>0.737</b> | 0.626           | <b>0.714</b> |
| cingulate gyr., isthmus          | 0.633            | <b>0.737</b> | 0.624           | <b>0.731</b> |
| <i>Frontal lobe</i>              |                  |              |                 |              |
| middle frontal gyr., rostral     | 0.605            | <b>0.738</b> | 0.615           | <b>0.736</b> |
| middle frontal gyr., caudal      | 0.569            | <b>0.787</b> | 0.590           | <b>0.799</b> |
| sup. frontal gyr.                | 0.667            | <b>0.769</b> | 0.660           | <b>0.757</b> |
| pars opercularis                 | 0.632            | 0.683        | 0.590           | <b>0.661</b> |
| pars triangularis                | 0.580            | <b>0.643</b> | 0.533           | <b>0.574</b> |
| pars orbitalis                   | 0.513            | 0.553        | 0.496           | <b>0.545</b> |
| lat. orbitofrontal               | 0.671            | <b>0.758</b> | 0.655           | <b>0.752</b> |
| med. orbitofrontal               | 0.583            | <b>0.657</b> | 0.580           | <b>0.660</b> |
| precentral gyr.                  | 0.646            | <b>0.781</b> | 0.643           | <b>0.788</b> |
| paracentral gyr.                 | 0.622            | <b>0.764</b> | 0.603           | <b>0.736</b> |
| <i>Occipital lobe</i>            |                  |              |                 |              |
| lingual gyr.                     | 0.634            | <b>0.776</b> | 0.605           | <b>0.752</b> |
| cuneus                           | 0.521            | <b>0.644</b> | 0.531           | <b>0.670</b> |
| lat. occipital lobe              | 0.551            | <b>0.700</b> | 0.533           | <b>0.706</b> |
| pericalcarine cort.              | 0.518            | <b>0.705</b> | 0.487           | <b>0.705</b> |
| <i>Parietal lobe</i>             |                  |              |                 |              |
| postcentral gyr.                 | 0.599            | <b>0.725</b> | 0.598           | <b>0.743</b> |
| sup. parietal gyr.               | 0.572            | <b>0.733</b> | 0.574           | <b>0.755</b> |
| supramarginal gyr.               | 0.605            | <b>0.679</b> | 0.623           | <b>0.733</b> |
| inf. parietal gyr.               | 0.595            | <b>0.709</b> | 0.590           | <b>0.732</b> |
| precuneus                        | 0.669            | <b>0.771</b> | 0.670           | <b>0.782</b> |

**Supplementary Table C3.** Jaccard overlap comparisons in MGC2012 atlas.

Leave-one-out cross-comparison results for MAPER and FreeSurfer segmentation of the MICCAI 2012 Grand Challenge atlas. The mean JC (across 30 subjects) for each region is shown, with significant differences in JC between MAPER and FreeSurfer (from Welch's two-tailed paired t-test, after adjustment for 132 multiple comparisons) shown in bold. Abbreviations as in Supp. Table B1.

| Region                           | Right hemisphere |            | Left hemisphere |            |
|----------------------------------|------------------|------------|-----------------|------------|
|                                  | MAPER            | FreeSurfer | MAPER           | FreeSurfer |
| <i>Temporal lobe</i>             |                  |            |                 |            |
| hippocampus                      | <b>0.747</b>     | 0.704      | <b>0.746</b>    | 0.700      |
| amygdala                         | <b>0.666</b>     | 0.599      | <b>0.666</b>    | 0.604      |
| entorhinal area                  | <b>0.544</b>     | 0.297      | <b>0.544</b>    | 0.338      |
| parahippocampal gyr.             | <b>0.583</b>     | 0.459      | <b>0.597</b>    | 0.487      |
| sup. temp. gyr.                  | <b>0.680</b>     | 0.544      | <b>0.618</b>    | 0.503      |
| middle temp. gyr.                | <b>0.675</b>     | 0.575      | <b>0.649</b>    | 0.538      |
| inf. temp. gyr.                  | <b>0.629</b>     | 0.547      | 0.578           | 0.537      |
| fusiform gyr.                    | <b>0.636</b>     | 0.504      | <b>0.610</b>    | 0.511      |
| transverse temp. gyr.            | <b>0.584</b>     | 0.456      | <b>0.589</b>    | 0.472      |
| temporal pole                    | <b>0.663</b>     | 0.580      | <b>0.680</b>    | 0.599      |
| planum temporale                 | <b>0.543</b>     | 0.426      | <b>0.561</b>    | 0.441      |
| planum polare                    | <b>0.588</b>     | 0.460      | <b>0.589</b>    | 0.495      |
| <i>Insula and cingulate gyri</i> |                  |            |                 |            |
| ant. insula                      | <b>0.748</b>     | 0.632      | <b>0.755</b>    | 0.627      |
| post. insula                     | <b>0.707</b>     | 0.577      | <b>0.694</b>    | 0.550      |
| cingulate gyrus, ant.            | <b>0.687</b>     | 0.502      | <b>0.652</b>    | 0.459      |
| cingulate gyrus, middle          | <b>0.710</b>     | 0.539      | <b>0.681</b>    | 0.509      |
| cingulate gyrus, post.           | <b>0.609</b>     | 0.494      | <b>0.638</b>    | 0.499      |
| <i>Frontal lobe</i>              |                  |            |                 |            |
| middle frontal gyr.              | <b>0.699</b>     | 0.556      | <b>0.724</b>    | 0.577      |
| precentral gyr.                  | <b>0.717</b>     | 0.588      | <b>0.713</b>    | 0.591      |
| precentral gyr., med.            | <b>0.548</b>     | 0.445      | <b>0.584</b>    | 0.470      |
| sup. frontal gyr.                | <b>0.668</b>     | 0.578      | <b>0.688</b>    | 0.588      |
| sup. frontal gyr., med.          | <b>0.656</b>     | 0.520      | <b>0.636</b>    | 0.516      |
| med. frontal cort.               | <b>0.381</b>     | 0.283      | <b>0.514</b>    | 0.348      |
| inf. frontal gyr., opercular     | <b>0.589</b>     | 0.451      | <b>0.577</b>    | 0.448      |
| inf. frontal gyr., orbital       | 0.402            | 0.362      | <b>0.423</b>    | 0.348      |
| inf. frontal gyr., triangular    | <b>0.541</b>     | 0.437      | <b>0.532</b>    | 0.441      |
| frontal operculum                | <b>0.547</b>     | 0.366      | <b>0.549</b>    | 0.372      |
| frontal pole                     | <b>0.527</b>     | 0.401      | <b>0.489</b>    | 0.376      |
| central operculum                | <b>0.649</b>     | 0.509      | <b>0.629</b>    | 0.495      |
| ant. orbital gyr.                | <b>0.454</b>     | 0.362      | <b>0.431</b>    | 0.299      |
| post. orbital gyr.               | <b>0.600</b>     | 0.526      | <b>0.619</b>    | 0.511      |
| med. orbital gyr.                | <b>0.637</b>     | 0.523      | <b>0.620</b>    | 0.439      |
| lat. orbital gyr.                | 0.419            | 0.364      | 0.443           | 0.376      |
| supplementary motor cort.        | <b>0.620</b>     | 0.522      | <b>0.623</b>    | 0.518      |
| <i>Occipital lobe</i>            |                  |            |                 |            |
| lingual gyr.                     | <b>0.601</b>     | 0.510      | <b>0.610</b>    | 0.494      |
| cuneus                           | <b>0.565</b>     | 0.427      | <b>0.585</b>    | 0.415      |
| sup. occipital gyr.              | <b>0.509</b>     | 0.397      | <b>0.482</b>    | 0.382      |
| middle occipital gyr.            | <b>0.538</b>     | 0.417      | <b>0.516</b>    | 0.410      |
| inf. occipital gyr.              | <b>0.511</b>     | 0.451      | <b>0.517</b>    | 0.424      |
| occipital pole                   | <b>0.489</b>     | 0.325      | <b>0.489</b>    | 0.334      |

|                                                       |              |       |              |       |
|-------------------------------------------------------|--------------|-------|--------------|-------|
| occipital fusiform gyr.                               | <b>0.411</b> | 0.343 | <b>0.417</b> | 0.349 |
| calcarine cort.                                       | <b>0.616</b> | 0.430 | <b>0.615</b> | 0.424 |
| <i>Parietal lobe</i>                                  |              |       |              |       |
| gyrus rectus                                          | <b>0.522</b> | 0.405 | <b>0.563</b> | 0.417 |
| postcentral gyr.                                      | <b>0.674</b> | 0.500 | <b>0.651</b> | 0.491 |
| postcentral gyr., med.                                | 0.369        | 0.314 | 0.392        | 0.303 |
| sup. parietal lobule                                  | <b>0.618</b> | 0.508 | <b>0.637</b> | 0.522 |
| supramarginal gyr.                                    | <b>0.573</b> | 0.473 | <b>0.560</b> | 0.473 |
| precuneus                                             | <b>0.668</b> | 0.537 | <b>0.675</b> | 0.516 |
| parietal operculum                                    | <b>0.557</b> | 0.421 | <b>0.552</b> | 0.426 |
| angular gyrus                                         | <b>0.559</b> | 0.459 | <b>0.540</b> | 0.455 |
| <i>Central structures</i>                             |              |       |              |       |
| caudate                                               | <b>0.795</b> | 0.745 | <b>0.794</b> | 0.729 |
| accumbens area                                        | <b>0.638</b> | 0.550 | <b>0.626</b> | 0.554 |
| putamen                                               | <b>0.839</b> | 0.789 | <b>0.834</b> | 0.788 |
| thalamus (proper)                                     | <b>0.845</b> | 0.799 | <b>0.851</b> | 0.796 |
| pallidum                                              | <b>0.758</b> | 0.711 | <b>0.740</b> | 0.685 |
| ventral diencephalon                                  | <b>0.795</b> | 0.725 | <b>0.794</b> | 0.723 |
| optic chiasm (np)                                     | 0.289        | 0.317 |              |       |
| subcallosal area                                      | <b>0.510</b> | 0.420 | <b>0.475</b> | 0.313 |
| <i>Posterior fossa, ventricles &amp; white matter</i> |              |       |              |       |
| cerebellum exterior                                   | 0.847        | 0.833 | 0.843        | 0.822 |
| cerebellar vermal lobules I-V (np)                    | <b>0.717</b> | 0.671 |              |       |
| cerebellar vermal lobules VI-VII (np)                 | <b>0.642</b> | 0.569 |              |       |
| cerebellar vermal lobules VIII-X (np)                 | <b>0.771</b> | 0.682 |              |       |
| brainstem                                             | <b>0.871</b> | 0.840 |              |       |
| lateral ventricle                                     | <b>0.855</b> | 0.783 | <b>0.860</b> | 0.800 |
| inf. lateral ventricle                                | 0.420        | 0.431 | 0.379        | 0.386 |
| third ventricle (np)                                  | <b>0.736</b> | 0.630 |              |       |
| fourth ventricle (np)                                 | <b>0.764</b> | 0.688 |              |       |
| cerebrospinal fluid (np)                              | <b>0.664</b> | 0.580 |              |       |
| cerebral white matter                                 | <b>0.887</b> | 0.869 | 0.882        | 0.867 |
| cerebellar white matter                               | 0.790        | 0.792 | 0.786        | 0.788 |

**Supplementary Table D1.** Group differences for the HM atlas database.

Negative percentage difference values indicate smaller volumes in AD than HC. Significant differences in structure volumes between HC and AD groups (from the ANCOVA, after adjustment for 93 multiple comparisons) shown in bold. Abbreviations as in Supp. Table B1.

| Region                           | MAPER            |                 |                 |                 | FreeSurfer       |                 |                 |                 |
|----------------------------------|------------------|-----------------|-----------------|-----------------|------------------|-----------------|-----------------|-----------------|
|                                  | Right Hemisphere |                 | Left Hemisphere |                 | Right Hemisphere |                 | Left Hemisphere |                 |
|                                  | % diff           | p-value         | % diff          | p-value         | % diff           | p-value         | % diff          | p-value         |
| <i>Temporal lobe</i>             |                  |                 |                 |                 |                  |                 |                 |                 |
| hippocampus                      | <b>-17.69</b>    | <b>1.46E-08</b> | <b>-22.68</b>   | <b>9.44E-11</b> | <b>-20.67</b>    | <b>1.98E-08</b> | <b>-25.59</b>   | <b>7.31E-12</b> |
| amygdala                         | <b>-16.42</b>    | <b>1.44E-05</b> | <b>-15.42</b>   | <b>7.22E-05</b> | <b>-20.12</b>    | <b>6.91E-07</b> | <b>-25.78</b>   | <b>3.71E-09</b> |
| ant. temp. lobe, med.            | -5.27            | 1.60E-01        | -7.96           | 2.02E-02        | -4.40            | 1.98E-01        | -7.37           | 3.21E-02        |
| ant. temp. lobe, lat.            | -8.37            | 1.96E-02        | -11.37          | 1.81E-02        | -7.88            | 4.35E-02        | -6.55           | 1.86E-01        |
| parahippocampal gyr.             | <b>-14.05</b>    | <b>6.53E-06</b> | <b>-17.31</b>   | <b>3.39E-08</b> | <b>-22.52</b>    | <b>1.04E-08</b> | <b>-23.12</b>   | <b>9.95E-09</b> |
| sup. temp. gyr., post.           | -7.11            | 7.97E-03        | -7.50           | 1.87E-02        | -4.25            | 8.28E-02        | -5.32           | 4.03E-02        |
| middle & inf. temp. gyr.         | -9.37            | 3.82E-03        | <b>-11.98</b>   | <b>1.68E-04</b> | -9.02            | 8.83E-04        | -9.74           | 1.60E-03        |
| fusiform gyr.                    | -6.25            | 9.65E-02        | <b>-13.16</b>   | <b>1.20E-04</b> | -10.47           | 6.38E-02        | -13.00          | 8.23E-03        |
| post. temp. lobe                 | <b>-8.56</b>     | <b>3.29E-04</b> | -7.76           | 6.80E-04        | <b>-9.46</b>     | <b>3.72E-04</b> | <b>-10.48</b>   | <b>1.87E-04</b> |
| sup. temp. gyr., ant.            | -3.28            | 3.99E-01        | -4.04           | 3.26E-01        | -10.19           | 1.58E-03        | -7.82           | 2.51E-02        |
| <i>Insula and cingulate gyri</i> |                  |                 |                 |                 |                  |                 |                 |                 |
| insula, post. long gyr.          | -9.41            | 7.77E-03        | -8.81           | 4.74E-03        | -4.14            | 1.88E-01        | -2.99           | 5.24E-01        |
| insula, ant. short gyr.          | -9.99            | 8.89E-03        | -6.79           | 1.13E-01        | -5.58            | 2.52E-01        | -7.96           | 3.64E-02        |
| insula, middle short gyr.        | -8.11            | 1.14E-01        | -9.78           | 4.72E-02        | -6.22            | 3.62E-01        | -2.04           | 8.01E-01        |
| insula, post. short gyr.         | -6.36            | 1.35E-01        | -5.90           | 8.81E-02        | -4.17            | 3.12E-01        | 0.34            | 8.04E-01        |
| insula, ant. inf. cort.          | -9.04            | 3.56E-02        | -8.26           | 5.57E-02        | -7.03            | 8.40E-02        | -7.10           | 2.59E-02        |
| insula, ant. long gyr.           | -5.40            | 9.86E-02        | -3.51           | 2.07E-01        | -3.07            | 4.07E-01        | 2.54            | 4.41E-01        |
| cingulate gyrus, ant.            | -1.07            | 8.81E-01        | 0.41            | 7.78E-01        | -2.08            | 6.21E-01        | -1.04           | 8.48E-01        |
| cingulate gyrus, post.           | -3.28            | 2.55E-01        | -5.79           | 3.84E-02        | -3.57            | 1.80E-01        | -7.09           | 9.95E-03        |
| <i>Frontal lobe</i>              |                  |                 |                 |                 |                  |                 |                 |                 |
| middle frontal gyr.              | -2.42            | 3.64E-01        | -2.35           | 3.93E-01        | -3.07            | 2.61E-01        | -4.60           | 6.96E-02        |
| precentral gyr.                  | -0.09            | 8.90E-01        | -2.28           | 2.81E-01        | -0.46            | 7.32E-01        | -0.53           | 6.42E-01        |
| ant. orbital gyr.                | -2.62            | 3.16E-01        | 1.36            | 6.52E-01        | -2.97            | 2.46E-01        | -2.30           | 4.20E-01        |
| inf. frontal gyr.                | 0.21             | 7.95E-01        | -1.64           | 5.92E-01        | 1.27             | 6.18E-01        | -3.42           | 2.24E-01        |
| sup. frontal gyr.                | -2.55            | 1.51E-01        | -0.98           | 6.07E-01        | -3.29            | 7.19E-02        | -3.63           | 6.19E-02        |
| med. orbital gyr.                | -0.16            | 9.93E-01        | 0.23            | 9.73E-01        | -2.44            | 2.81E-01        | -1.20           | 5.29E-01        |



|                                         |              |                 |              |                 |              |                 |              |                 |
|-----------------------------------------|--------------|-----------------|--------------|-----------------|--------------|-----------------|--------------|-----------------|
| lat. orbital gyr.                       | -5.16        | 1.41E-01        | -4.52        | 1.19E-01        | -4.55        | 1.70E-01        | -5.10        | 6.13E-02        |
| post. orbital gyr.                      | -2.78        | 3.88E-01        | -5.22        | 5.50E-02        | 0.38         | 8.53E-01        | -3.12        | 3.27E-01        |
| subgenual frontal cort.                 | -0.48        | 9.09E-01        | 6.48         | 1.12E-01        | -3.91        | 5.20E-01        | 4.06         | 2.81E-01        |
| pre-subgenual frontal cort.             | -1.07        | 8.22E-01        | 13.46        | 2.70E-02        | 0.01         | 8.96E-01        | 10.25        | 6.33E-02        |
| <i>Occipital lobe</i>                   |              |                 |              |                 |              |                 |              |                 |
| lingual gyr.                            | -4.12        | 2.25E-01        | -2.48        | 5.12E-01        | -7.36        | 1.98E-02        | -5.03        | 1.43E-01        |
| cuneus                                  | -7.86        | 4.97E-02        | 0.05         | 9.75E-01        | -4.85        | 1.06E-01        | -1.74        | 6.66E-01        |
| occipital lobe                          | -8.17        | 3.66E-03        | -8.89        | 5.93E-03        | -6.18        | 1.52E-02        | -6.72        | 9.24E-03        |
| <i>Parietal lobe</i>                    |              |                 |              |                 |              |                 |              |                 |
| straight gyr.                           | 1.34         | 6.23E-01        | 0.12         | 9.17E-01        | -4.15        | 9.33E-02        | -2.69        | 3.01E-01        |
| postcentral gyr.                        | -0.17        | 8.50E-01        | -0.49        | 8.23E-01        | 1.53         | 5.86E-01        | -1.30        | 6.00E-01        |
| sup. parietal gyr.                      | -7.18        | 1.63E-02        | -5.23        | 9.07E-02        | -6.85        | 4.94E-03        | -8.56        | 2.01E-03        |
| supramarginal gyr.                      | -6.06        | 6.53E-02        | -4.30        | 1.17E-01        | -4.38        | 1.43E-01        | -4.22        | 1.52E-01        |
| angular gyr.                            | -10.75       | 6.54E-04        | -9.49        | 6.09E-03        | -11.62       | 1.45E-03        | -8.50        | 3.49E-03        |
| <i>Central structures</i>               |              |                 |              |                 |              |                 |              |                 |
| caudate nucleus                         | 6.30         | 9.81E-02        | 4.02         | 2.28E-01        | 1.66         | 4.67E-01        | 1.43         | 5.23E-01        |
| nucleus accumbens                       | -8.41        | 5.98E-02        | -12.63       | 1.36E-02        | -13.83       | 2.05E-02        | -15.32       | 9.05E-03        |
| putamen                                 | -1.68        | 6.44E-01        | -1.31        | 7.30E-01        | -7.11        | 3.12E-02        | -4.63        | 2.23E-01        |
| thalamus                                | <b>-8.16</b> | <b>2.01E-05</b> | -5.73        | 7.07E-03        | -6.31        | 1.08E-03        | -6.38        | 1.56E-03        |
| pallidum                                | -1.89        | 4.39E-01        | -3.53        | 3.11E-01        | -3.94        | 1.54E-01        | -4.33        | 2.69E-01        |
| corpus callosum (np)                    | -4.72        | 2.74E-02        |              |                 | 0.99         | 4.41E-01        |              |                 |
| substantia nigra                        | -6.70        | 1.17E-01        | -6.62        | 9.13E-02        | -9.90        | 3.56E-01        | 1.72         | 9.54E-01        |
| <i>Posterior fossa &amp; ventricles</i> |              |                 |              |                 |              |                 |              |                 |
| cerebellum                              | -2.20        | 2.29E-01        | -1.70        | 3.08E-01        | -2.07        | 2.65E-01        | -1.96        | 2.48E-01        |
| brainstem (np)                          | -3.50        | 6.82E-02        |              |                 | -4.38        | 2.81E-02        |              |                 |
| lat. ventricle, main                    | <b>37.03</b> | <b>2.16E-06</b> | <b>32.42</b> | <b>1.69E-05</b> | <b>44.99</b> | <b>2.02E-06</b> | <b>40.56</b> | <b>3.37E-06</b> |
| lat. ventricle, temp. horn              | <b>36.40</b> | <b>1.42E-04</b> | <b>39.47</b> | <b>5.17E-05</b> | <b>30.50</b> | <b>2.80E-04</b> | <b>35.52</b> | <b>5.12E-05</b> |
| third ventricle (np)                    | 14.50        | 1.44E-02        |              |                 | 12.88        | 1.14E-02        |              |                 |

**Supplementary Table D2.** Group differences for the DKT40 atlas database.

Group differences between healthy control (HC) subjects and Alzheimer's Disease (AD) patients for the DKT40 atlas set with the MAPER and FreeSurfer segmentation methods. Negative percentage difference values indicate smaller volumes in AD than HC. Significant differences in structure volumes between HC and AD groups (from the ANCOVA, after adjustment for 62 multiple comparisons) shown in bold. Abbreviations as in Supp. Table B1.

| Region                           | MAPER            |                 |                 |                 | FreeSurfer       |                 |                 |                 |
|----------------------------------|------------------|-----------------|-----------------|-----------------|------------------|-----------------|-----------------|-----------------|
|                                  | Right Hemisphere |                 | Left Hemisphere |                 | Right Hemisphere |                 | Left Hemisphere |                 |
|                                  | % diff           | p-value         | % diff          | p-value         | % diff           | p-value         | % diff          | p-value         |
| <i>Temporal lobe</i>             |                  |                 |                 |                 |                  |                 |                 |                 |
| entorhinal cort.                 | <b>-17.28</b>    | <b>3.12E-05</b> | <b>-19.84</b>   | <b>3.65E-06</b> | <b>-26.09</b>    | <b>1.70E-07</b> | <b>-27.03</b>   | <b>5.32E-09</b> |
| parahippocampal gyr.             | <b>-13.61</b>    | <b>1.54E-04</b> | <b>-18.94</b>   | <b>1.20E-06</b> | <b>-15.93</b>    | <b>4.35E-06</b> | <b>-13.91</b>   | <b>1.65E-04</b> |
| sup. temp. gyr.                  | -5.58            | 2.76E-02        | -5.92           | 1.82E-02        | -6.31            | 3.39E-03        | -5.86           | 1.50E-02        |
| middle temp. gyr.                | <b>-8.40</b>     | <b>5.65E-04</b> | <b>-9.80</b>    | <b>1.09E-04</b> | -6.34            | 7.59E-03        | <b>-9.26</b>    | <b>7.61E-04</b> |
| inf. temp. gyr.                  | -9.31            | 2.28E-03        | <b>-9.98</b>    | <b>5.56E-04</b> | -10.48           | 1.98E-03        | <b>-12.13</b>   | <b>1.84E-04</b> |
| fusiform gyr.                    | -4.36            | 1.56E-01        | -7.16           | 1.54E-02        | <b>-11.60</b>    | <b>4.63E-05</b> | <b>-11.74</b>   | <b>2.98E-04</b> |
| transverse temp. gyr.            | -4.88            | 1.98E-01        | -2.47           | 5.79E-01        | 0.30             | 8.87E-01        | -1.07           | 7.30E-01        |
| <i>Insula and cingulate gyri</i> |                  |                 |                 |                 |                  |                 |                 |                 |
| insula cort.                     | -6.28            | 5.42E-03        | -5.24           | 1.28E-02        | -4.70            | 5.17E-02        | -3.54           | 9.79E-02        |
| cingulate gyr., rostral ant.     | -2.83            | 5.86E-01        | 4.65            | 2.07E-01        | 0.85             | 7.73E-01        | 0.47            | 7.97E-01        |
| cingulate gyr., caudal ant.      | 2.24             | 5.02E-01        | 4.97            | 9.08E-02        | -5.47            | 2.50E-01        | -2.04           | 4.42E-01        |
| cingulate gyr., post.            | 2.46             | 3.20E-01        | 1.77            | 4.69E-01        | -2.98            | 3.40E-01        | -4.78           | 9.81E-02        |
| cingulate gyr., isthmus          | -9.09            | 2.63E-02        | <b>-15.51</b>   | <b>6.28E-05</b> | -7.77            | 1.96E-02        | <b>-12.36</b>   | <b>1.33E-04</b> |
| <i>Frontal lobe</i>              |                  |                 |                 |                 |                  |                 |                 |                 |
| middle frontal gyr., rostral     | -2.93            | 2.74E-01        | -2.21           | 3.96E-01        | -2.40            | 3.98E-01        | -5.38           | 4.06E-02        |
| middle frontal gyr., caudal      | -1.80            | 5.77E-01        | -5.33           | 1.18E-01        | -3.50            | 4.05E-01        | -2.84           | 3.69E-01        |
| sup. frontal gyr.                | -3.15            | 1.17E-01        | -2.18           | 2.75E-01        | -3.54            | 4.90E-02        | -3.53           | 7.83E-02        |
| pars opercularis                 | 3.56             | 1.71E-01        | 4.42            | 1.82E-01        | 6.10             | 5.89E-02        | -0.60           | 8.24E-01        |
| pars triangularis                | -4.49            | 2.51E-01        | -5.09           | 2.24E-01        | -3.76            | 4.86E-01        | -5.00           | 1.53E-01        |
| pars orbitalis                   | -3.07            | 5.13E-01        | -3.97           | 4.66E-01        | -2.12            | 4.97E-01        | -6.67           | 5.52E-02        |
| lat. orbitofrontal               | 0.54             | 7.59E-01        | 0.00            | 9.75E-01        | -1.49            | 3.87E-01        | -2.16           | 2.08E-01        |
| med. orbitofrontal               | 0.63             | 6.67E-01        | -3.00           | 2.02E-01        | -4.57            | 6.08E-02        | -2.05           | 4.04E-01        |
| precentral gyr.                  | -0.78            | 6.59E-01        | -2.01           | 3.68E-01        | -1.15            | 5.37E-01        | -0.88           | 5.49E-01        |
| paracentral gyr.                 | 0.21             | 9.26E-01        | -3.19           | 2.13E-01        | 5.00             | 1.15E-01        | -0.17           | 8.96E-01        |
| <i>Occipital lobe</i>            |                  |                 |                 |                 |                  |                 |                 |                 |

|                      |               |                 |        |          |               |                 |              |                 |
|----------------------|---------------|-----------------|--------|----------|---------------|-----------------|--------------|-----------------|
| lingual gyr.         | -3.32         | 2.98E-01        | -2.33  | 5.38E-01 | -7.82         | 1.19E-02        | -5.70        | 9.28E-02        |
| cuneus               | -6.24         | 1.36E-01        | 0.19   | 9.26E-01 | -5.63         | 5.49E-02        | -4.24        | 2.17E-01        |
| lat. occipital lobe  | -9.47         | 3.32E-03        | -11.69 | 5.63E-03 | -3.80         | 2.61E-01        | -4.48        | 1.78E-01        |
| pericalcarine cort.  | -0.85         | 9.18E-01        | -0.23  | 9.64E-01 | 0.28          | 9.27E-01        | 4.18         | 2.94E-01        |
| <i>Parietal lobe</i> |               |                 |        |          |               |                 |              |                 |
| postcentral gyr.     | -0.03         | 9.68E-01        | 0.87   | 7.68E-01 | 0.39          | 9.18E-01        | -1.27        | 6.45E-01        |
| sup. parietal gyr.   | -8.80         | 6.53E-03        | -4.38  | 2.68E-01 | -7.83         | 8.97E-03        | -8.18        | 1.44E-02        |
| supramarginal gyr.   | -6.48         | 2.75E-02        | -2.89  | 2.64E-01 | -4.12         | 1.80E-01        | -4.26        | 1.31E-01        |
| inf. parietal gyr.   | <b>-11.22</b> | <b>2.44E-04</b> | -8.59  | 8.66E-03 | <b>-10.43</b> | <b>6.91E-04</b> | -8.19        | 5.06E-03        |
| precuneus            | -5.25         | 6.76E-02        | -8.54  | 2.38E-03 | -6.08         | 1.06E-02        | <b>-9.49</b> | <b>3.26E-04</b> |

**Supplementary Table D3.** Group differences for the MGC2012 atlas database.

Group differences between healthy control (HC) subjects and Alzheimer's Disease (AD) patients for the MGC2012 atlas set with the MAPER and FreeSurfer segmentation methods. Negative percentage difference values indicate smaller volumes in AD than HC. Significant differences in structure volumes between HC and AD groups (from the ANCOVA, after adjustment for 132 multiple comparisons) shown in bold. Abbreviations as in Supp. Table B1.

| Region                           | MAPER            |                 |                 |                 | FreeSurfer       |                 |                 |                 |
|----------------------------------|------------------|-----------------|-----------------|-----------------|------------------|-----------------|-----------------|-----------------|
|                                  | Right Hemisphere |                 | Left Hemisphere |                 | Right Hemisphere |                 | Left Hemisphere |                 |
|                                  | % diff           | p-value         | % diff          | p-value         | % diff           | p-value         | % diff          | p-value         |
| <i>Temporal lobe</i>             |                  |                 |                 |                 |                  |                 |                 |                 |
| hippocampus                      | <b>-9.65</b>     | <b>2.89E-04</b> | <b>-10.78</b>   | <b>1.24E-04</b> | <b>-20.00</b>    | <b>4.16E-10</b> | <b>-22.88</b>   | <b>2.54E-11</b> |
| amygdala                         | <b>-17.04</b>    | <b>9.45E-06</b> | <b>-18.24</b>   | <b>3.07E-06</b> | <b>-34.46</b>    | <b>9.82E-07</b> | <b>-37.26</b>   | <b>4.86E-08</b> |
| entorhinal area                  | <b>-13.14</b>    | <b>2.34E-04</b> | <b>-16.12</b>   | <b>3.70E-05</b> | -21.08           | 2.34E-03        | <b>-26.30</b>   | <b>1.20E-06</b> |
| parahippocampal gyr.             | <b>-10.07</b>    | <b>2.99E-04</b> | <b>-13.42</b>   | <b>5.99E-06</b> | <b>-20.79</b>    | <b>1.42E-08</b> | <b>-19.88</b>   | <b>2.68E-08</b> |
| sup. temp. gyr.                  | -6.28            | 2.15E-02        | -7.60           | 1.04E-02        | -7.98            | 7.33E-03        | -6.31           | 4.93E-02        |
| middle temp. gyr.                | -5.49            | 7.42E-03        | -6.43           | 4.18E-03        | -6.51            | 6.57E-03        | -8.42           | 2.20E-03        |
| inf. temp. gyr.                  | -7.12            | 8.60E-03        | -8.18           | 2.05E-03        | -10.56           | 2.47E-03        | <b>-12.63</b>   | <b>1.87E-04</b> |
| fusiform gyr.                    | -3.48            | 2.37E-01        | -4.93           | 1.11E-01        | -11.18           | 5.12E-04        | -11.29          | 6.46E-04        |
| transverse temp. gyr.            | -1.19            | 6.59E-01        | 2.73            | 5.49E-01        | -0.04            | 7.96E-01        | -1.18           | 6.88E-01        |
| temporal pole                    | -2.93            | 3.64E-01        | -3.15           | 3.91E-01        | -6.27            | 1.45E-02        | -6.54           | 3.03E-02        |
| planum temporale                 | -1.37            | 7.07E-01        | -3.01           | 5.58E-01        | -4.63            | 2.31E-01        | -7.38           | 5.72E-02        |
| planum polare                    | 1.56             | 5.58E-01        | -1.52           | 6.03E-01        | -3.51            | 2.43E-01        | -3.83           | 1.99E-01        |
| <i>Insula and cingulate gyri</i> |                  |                 |                 |                 |                  |                 |                 |                 |
| ant. insula                      | -5.15            | 5.43E-02        | -3.63           | 2.05E-01        | -6.28            | 2.51E-02        | -4.92           | 5.90E-02        |
| post. insula                     | -2.52            | 3.44E-01        | -2.24           | 3.99E-01        | -3.21            | 2.51E-01        | 0.39            | 8.58E-01        |
| cingulate gyrus, ant.            | -0.20            | 8.85E-01        | 3.02            | 2.01E-01        | -0.69            | 9.36E-01        | -1.67           | 6.69E-01        |
| cingulate gyrus, middle          | 4.30             | 4.08E-02        | 8.66            | 4.39E-04        | -3.16            | 3.80E-01        | -2.10           | 5.33E-01        |
| cingulate gyrus, post.           | -6.30            | 2.54E-02        | <b>-9.47</b>    | <b>1.52E-04</b> | -7.24            | 1.05E-02        | <b>-10.20</b>   | <b>2.66E-04</b> |
| <i>Frontal lobe</i>              |                  |                 |                 |                 |                  |                 |                 |                 |
| middle frontal gyr.              | -0.84            | 8.35E-01        | -1.73           | 4.74E-01        | -2.47            | 3.90E-01        | -4.00           | 1.17E-01        |
| precentral gyr.                  | 0.00             | 9.84E-01        | -1.04           | 6.83E-01        | -1.82            | 4.00E-01        | -1.76           | 3.26E-01        |
| precentral gyr., med.            | 0.13             | 9.90E-01        | -2.37           | 4.50E-01        | 5.40             | 1.48E-01        | 0.44            | 9.88E-01        |
| sup. frontal gyr.                | -4.09            | 1.30E-01        | -0.06           | 9.86E-01        | -5.12            | 2.86E-02        | -2.81           | 2.24E-01        |
| sup. frontal gyr., med.          | 1.51             | 3.87E-01        | 1.01            | 5.35E-01        | -3.81            | 1.13E-01        | -4.41           | 1.22E-01        |
| med. frontal cort.               | 3.82             | 1.00E-01        | 1.69            | 6.12E-01        | -5.62            | 1.12E-01        | -2.28           | 5.28E-01        |

|                               |              |                 |        |          |              |                 |              |                 |
|-------------------------------|--------------|-----------------|--------|----------|--------------|-----------------|--------------|-----------------|
| inf. frontal gyr., opercular  | 5.99         | 8.01E-02        | 4.55   | 1.84E-01 | 5.98         | 1.41E-01        | -1.28        | 7.23E-01        |
| inf. frontal gyr., orbital    | 1.32         | 7.58E-01        | -2.12  | 8.36E-01 | 1.40         | 6.98E-01        | -3.88        | 3.80E-01        |
| inf. frontal gyr., triangular | -4.42        | 1.81E-01        | -2.43  | 7.09E-01 | -4.18        | 4.25E-01        | -4.86        | 1.94E-01        |
| frontal operculum             | -0.53        | 8.67E-01        | -2.78  | 5.09E-01 | 3.92         | 3.06E-01        | 0.41         | 9.76E-01        |
| frontal pole                  | 0.45         | 9.05E-01        | -3.23  | 4.93E-01 | -3.22        | 3.56E-01        | -3.72        | 2.96E-01        |
| central operculum             | 2.99         | 2.06E-01        | 4.29   | 3.96E-02 | 1.98         | 3.96E-01        | 2.18         | 4.28E-01        |
| ant. orbital gyr.             | 1.69         | 6.11E-01        | 0.96   | 7.47E-01 | -2.30        | 4.07E-01        | -4.27        | 3.00E-01        |
| post. orbital gyr.            | 1.67         | 5.43E-01        | -1.17  | 8.65E-01 | 0.07         | 9.76E-01        | -4.86        | 1.15E-01        |
| med. orbital gyr.             | 1.31         | 5.72E-01        | 1.33   | 6.42E-01 | -2.14        | 3.34E-01        | 0.38         | 9.50E-01        |
| lat. orbital gyr.             | -6.47        | 9.79E-02        | -1.24  | 7.66E-01 | -5.64        | 1.18E-01        | -7.35        | 1.58E-02        |
| supplementary motor cort.     | 2.68         | 2.90E-01        | -3.69  | 1.37E-01 | 2.98         | 2.67E-01        | -3.32        | 1.77E-01        |
| <i>Occipital lobe</i>         |              |                 |        |          |              |                 |              |                 |
| lingual gyr.                  | -2.30        | 3.99E-01        | -1.84  | 6.28E-01 | -8.36        | 6.53E-03        | -6.48        | 5.56E-02        |
| cuneus                        | -6.11        | 6.78E-02        | 1.26   | 5.76E-01 | -4.78        | 1.18E-01        | -4.87        | 1.83E-01        |
| sup. occipital gyr.           | -9.27        | 6.51E-03        | -7.44  | 3.07E-02 | -8.60        | 3.57E-02        | -10.79       | 4.30E-03        |
| middle occipital gyr.         | -8.47        | 1.43E-02        | -7.73  | 4.28E-02 | -6.56        | 1.37E-01        | -6.11        | 1.09E-01        |
| inf. occipital gyr.           | -4.41        | 1.10E-01        | -7.36  | 2.96E-02 | -4.94        | 2.11E-01        | -6.63        | 8.38E-02        |
| occipital pole                | -2.76        | 6.31E-01        | -7.47  | 1.97E-01 | -2.48        | 5.90E-01        | 0.05         | 9.54E-01        |
| occipital fusiform gyr.       | -5.09        | 9.78E-02        | -10.51 | 4.72E-03 | -8.94        | 2.12E-02        | -8.24        | 2.72E-02        |
| calcarine cort.               | -1.48        | 9.57E-01        | 2.19   | 3.98E-01 | -0.57        | 8.97E-01        | 3.05         | 3.59E-01        |
| <i>Parietal lobe</i>          |              |                 |        |          |              |                 |              |                 |
| gyrus rectus                  | 4.99         | 1.49E-01        | 1.40   | 7.40E-01 | -3.76        | 1.48E-01        | -1.40        | 5.90E-01        |
| postcentral gyr.              | 0.78         | 7.18E-01        | -0.31  | 9.66E-01 | -0.21        | 8.97E-01        | -2.31        | 4.48E-01        |
| postcentral gyr., med.        | -0.10        | 9.76E-01        | -3.37  | 4.95E-01 | 2.83         | 5.13E-01        | -2.77        | 5.25E-01        |
| sup. parietal lobule          | -7.19        | 1.10E-02        | -2.73  | 4.47E-01 | -7.17        | 2.00E-02        | -8.01        | 2.87E-02        |
| supramarginal gyr.            | -5.12        | 1.48E-01        | -3.88  | 1.97E-01 | -5.95        | 7.61E-02        | -5.74        | 4.79E-02        |
| precuneus                     | -3.19        | 2.72E-01        | -6.35  | 9.88E-03 | -6.56        | 8.85E-03        | <b>-9.47</b> | <b>3.24E-04</b> |
| parietal operculum            | 0.34         | 9.39E-01        | 4.75   | 1.53E-01 | 2.64         | 5.89E-01        | 2.74         | 4.86E-01        |
| angular gyrus                 | -7.90        | 8.31E-03        | -5.68  | 8.81E-02 | -11.78       | 9.07E-04        | -8.83        | 3.79E-03        |
| <i>Central structures</i>     |              |                 |        |          |              |                 |              |                 |
| caudate                       | 6.66         | 1.35E-01        | 4.18   | 2.32E-01 | -0.36        | 9.37E-01        | -3.39        | 4.37E-01        |
| accumbens area                | -5.00        | 2.63E-01        | -11.76 | 3.03E-02 | -16.65       | 4.75E-02        | -28.31       | 1.72E-02        |
| putamen                       | -2.75        | 4.54E-01        | -2.19  | 5.98E-01 | -9.68        | 1.14E-02        | -8.48        | 5.81E-02        |
| thalamus (proper)             | <b>-7.78</b> | <b>1.97E-05</b> | -6.82  | 1.09E-03 | <b>-6.37</b> | <b>1.88E-04</b> | <b>-5.87</b> | <b>1.53E-04</b> |
| pallidum                      | -0.83        | 6.70E-01        | -1.71  | 5.93E-01 | -2.99        | 1.78E-01        | -0.56        | 7.27E-01        |

|                                                       |              |                 |              |                 |              |                 |              |                 |
|-------------------------------------------------------|--------------|-----------------|--------------|-----------------|--------------|-----------------|--------------|-----------------|
| ventral diencephalon                                  | -4.49        | 5.83E-03        | -5.99        | 7.60E-04        | -4.96        | 6.08E-03        | -7.05        | 6.65E-04        |
| optic chiasm (np)                                     | 6.34         | 2.50E-02        |              |                 | -5.08        | 6.76E-01        |              |                 |
| subcallosal area                                      | 0.99         | 6.06E-01        | -0.82        | 9.45E-01        | -7.02        | 1.37E-01        | -5.44        | 2.09E-01        |
| <i>Posterior fossa, ventricles &amp; white matter</i> |              |                 |              |                 |              |                 |              |                 |
| cerebellum exterior                                   | -1.83        | 3.33E-01        | -1.21        | 5.16E-01        | -1.52        | 4.91E-01        | -1.53        | 4.76E-01        |
| cerebellar vermal lobules I-V (np)                    | -4.72        | 5.28E-02        |              |                 | -5.41        | 9.31E-02        |              |                 |
| cerebellar vermal lobules VI-VII (np)                 | -5.40        | 4.54E-02        |              |                 | -3.07        | 1.74E-01        |              |                 |
| cerebellar vermal lobules VIII-X (np)                 | -0.13        | 9.81E-01        |              |                 | -2.85        | 2.78E-01        |              |                 |
| brainstem (np)                                        | -4.02        | 4.61E-02        |              |                 | -4.31        | 3.75E-02        |              |                 |
| lateral ventricle                                     | <b>46.22</b> | <b>1.36E-06</b> | <b>47.44</b> | <b>7.03E-06</b> | <b>47.30</b> | <b>1.16E-06</b> | <b>41.77</b> | <b>4.38E-06</b> |
| inf. lateral ventricle                                | <b>45.56</b> | <b>1.38E-04</b> | <b>48.09</b> | <b>1.24E-05</b> | <b>69.58</b> | <b>3.07E-06</b> | <b>73.70</b> | <b>4.74E-07</b> |
| third ventricle (np)                                  | 19.81        | 4.66E-03        |              |                 | 13.54        | 1.28E-02        |              |                 |
| fourth ventricle (np)                                 | 4.35         | 4.08E-01        |              |                 | 9.75         | 1.14E-01        |              |                 |
| cerebrospinal fluid (np)                              | 6.29         | 1.97E-01        |              |                 | 14.52        | 3.78E-03        |              |                 |
| cerebral white matter                                 | -3.56        | 3.15E-02        | -3.91        | 2.41E-02        | -4.71        | 3.77E-04        | -4.40        | 2.41E-03        |
| cerebellar white matter                               | -3.56        | 2.76E-01        | -4.32        | 1.63E-01        | -1.73        | 4.64E-01        | -1.84        | 3.74E-01        |

**Supplementary Table E1.** Group differences for the HM atlas database (left HS).

Group differences between healthy control (HC) subjects and left hippocampal sclerosis (LHS) patients for the HM atlas set with the MAPER and FreeSurfer segmentation methods. Negative percentage difference values indicate smaller volumes in LHS than HC. Significant differences in structure volumes between HC and LHS groups (from the ANCOVA, after adjustment for 93 multiple comparisons) shown in bold. Abbreviations as in Supp. Table B1.

| Region                           | MAPER            |          |                 |                 | FreeSurfer       |          |                 |                 |
|----------------------------------|------------------|----------|-----------------|-----------------|------------------|----------|-----------------|-----------------|
|                                  | Right Hemisphere |          | Left Hemisphere |                 | Right Hemisphere |          | Left Hemisphere |                 |
|                                  | % diff           | p-value  | % diff          | p-value         | % diff           | p-value  | % diff          | p-value         |
| <i>Temporal lobe</i>             |                  |          |                 |                 |                  |          |                 |                 |
| hippocampus                      | -4.39            | 1.24E-01 | <b>-32.52</b>   | <b>7.00E-20</b> | -4.63            | 2.14E-01 | <b>-34.15</b>   | <b>8.00E-20</b> |
| amygdala                         | -7.68            | 5.53E-03 | -1.89           | 4.74E-01        | -1.62            | 6.48E-01 | -8.46           | 2.12E-02        |
| ant. temp. lobe, med.            | -5.18            | 2.54E-02 | -8.95           | 2.78E-03        | -4.17            | 2.08E-01 | <b>-15.64</b>   | <b>2.54E-05</b> |
| ant. temp. lobe, lat.            | -2.25            | 3.63E-01 | -4.07           | 2.29E-01        | -3.99            | 2.94E-01 | -12.33          | 6.11E-03        |
| parahippocampal gyr.             | -6.97            | 6.48E-03 | -5.55           | 1.88E-02        | 3.45             | 2.11E-01 | <b>-11.25</b>   | <b>2.13E-04</b> |
| sup. temp. gyr., post.           | -1.31            | 6.54E-01 | -3.65           | 1.32E-01        | -4.55            | 8.13E-02 | -7.62           | 6.28E-03        |
| middle & inf. temp. gyr.         | -3.99            | 3.72E-02 | -0.79           | 8.28E-01        | -0.96            | 8.28E-01 | -6.09           | 1.38E-02        |
| fusiform gyr.                    | -5.87            | 1.73E-02 | -1.77           | 4.90E-01        | -1.58            | 7.37E-01 | -9.14           | 4.11E-02        |
| post. temp. lobe                 | -0.07            | 9.72E-01 | -4.73           | 3.05E-03        | -3.79            | 1.47E-01 | <b>-8.73</b>    | <b>3.58E-04</b> |
| sup. temp. gyr., ant.            | -5.32            | 1.03E-01 | -9.67           | 5.01E-03        | -7.12            | 5.60E-02 | <b>-16.82</b>   | <b>1.14E-06</b> |
| <i>Insula and cingulate gyri</i> |                  |          |                 |                 |                  |          |                 |                 |
| insula, post. long gyr.          | -4.79            | 4.94E-02 | -1.31           | 6.65E-01        | 3.78             | 1.89E-01 | -2.01           | 5.62E-01        |
| insula, ant. short gyr.          | -1.61            | 6.39E-01 | -0.25           | 8.50E-01        | 0.76             | 7.80E-01 | -0.74           | 9.49E-01        |
| insula, middle short gyr.        | -1.44            | 6.37E-01 | -0.94           | 6.93E-01        | -7.48            | 7.63E-02 | -3.59           | 3.47E-01        |
| insula, post. short gyr.         | -2.69            | 4.07E-01 | -1.39           | 7.30E-01        | -4.09            | 2.16E-01 | -10.24          | 4.78E-03        |
| insula, ant. inf. cort.          | -3.77            | 1.76E-01 | -0.41           | 9.94E-01        | -7.02            | 1.29E-01 | -13.43          | 1.07E-03        |
| insula, ant. long gyr.           | -4.49            | 7.35E-02 | -1.80           | 4.55E-01        | -5.22            | 1.06E-01 | -9.27           | 9.22E-03        |
| cingulate gyrus, ant.            | -4.19            | 2.17E-01 | -1.01           | 7.66E-01        | 1.02             | 6.74E-01 | -2.78           | 3.88E-01        |
| cingulate gyrus, post.           | -0.51            | 8.27E-01 | -1.74           | 5.51E-01        | -2.44            | 3.12E-01 | -1.41           | 7.31E-01        |
| <i>Frontal lobe</i>              |                  |          |                 |                 |                  |          |                 |                 |
| middle frontal gyr.              | -0.34            | 9.17E-01 | -3.14           | 1.15E-01        | -2.86            | 3.34E-01 | -7.79           | 1.64E-03        |
| precentral gyr.                  | -1.76            | 4.44E-01 | -1.02           | 6.38E-01        | -6.72            | 1.83E-02 | -6.38           | 2.84E-02        |
| ant. orbital gyr.                | -2.86            | 1.86E-01 | -1.96           | 2.69E-01        | 0.60             | 6.48E-01 | -0.02           | 8.55E-01        |
| inf. frontal gyr.                | -3.39            | 1.22E-01 | -2.23           | 4.11E-01        | -4.90            | 1.12E-01 | -3.57           | 3.11E-01        |
| sup. frontal gyr.                | -7.19            | 1.90E-03 | -5.01           | 2.09E-02        | -6.35            | 8.60E-03 | -5.80           | 1.99E-02        |

|                                         |               |                 |        |          |               |                 |              |                 |
|-----------------------------------------|---------------|-----------------|--------|----------|---------------|-----------------|--------------|-----------------|
| med. orbital gyr.                       | -0.94         | 6.84E-01        | -0.60  | 6.55E-01 | -1.01         | 8.52E-01        | -2.53        | 3.55E-01        |
| lat. orbital gyr.                       | -1.96         | 5.57E-01        | -0.75  | 8.92E-01 | -4.83         | 1.62E-01        | -5.87        | 8.51E-02        |
| post. orbital gyr.                      | -1.85         | 3.61E-01        | -3.92  | 7.10E-02 | -2.90         | 3.51E-01        | -2.76        | 3.63E-01        |
| subgenual frontal cort.                 | -1.38         | 6.74E-01        | -6.08  | 8.01E-02 | -6.31         | 2.36E-01        | -1.44        | 7.80E-01        |
| pre-subgenual frontal cort.             | -6.76         | 1.98E-01        | -4.49  | 3.04E-01 | -7.22         | 1.37E-01        | 0.23         | 8.46E-01        |
| <i>Occipital lobe</i>                   |               |                 |        |          |               |                 |              |                 |
| lingual gyr.                            | -0.36         | 9.23E-01        | -1.06  | 7.11E-01 | -0.25         | 9.47E-01        | -6.08        | 1.30E-01        |
| cuneus                                  | -3.20         | 3.37E-01        | -6.14  | 1.13E-01 | -7.59         | 9.34E-03        | -7.15        | 2.31E-02        |
| occipital lobe                          | -1.51         | 4.99E-01        | -2.14  | 3.53E-01 | -3.82         | 1.38E-01        | -6.03        | 4.11E-02        |
| <i>Parietal lobe</i>                    |               |                 |        |          |               |                 |              |                 |
| straight gyr.                           | -0.53         | 7.77E-01        | -0.11  | 9.93E-01 | -3.19         | 2.54E-01        | -1.53        | 6.64E-01        |
| postcentral gyr.                        | -5.41         | 9.56E-03        | -4.20  | 5.01E-02 | <b>-10.59</b> | <b>2.70E-05</b> | <b>-8.49</b> | <b>9.88E-04</b> |
| sup. parietal gyr.                      | -2.66         | 2.29E-01        | -2.87  | 1.77E-01 | -4.15         | 1.07E-01        | -4.36        | 9.82E-02        |
| supramarginal gyr.                      | -5.45         | 2.13E-02        | -2.70  | 2.99E-01 | -4.63         | 1.34E-01        | -4.97        | 1.05E-01        |
| angular gyr.                            | -1.12         | 8.02E-01        | -7.80  | 1.57E-02 | -5.48         | 1.54E-01        | -8.39        | 8.20E-03        |
| <i>Central structures</i>               |               |                 |        |          |               |                 |              |                 |
| caudate nucleus                         | -2.53         | 3.18E-01        | -0.23  | 9.75E-01 | -2.96         | 4.66E-01        | -1.22        | 7.14E-01        |
| nucleus accumbens                       | -3.71         | 3.24E-01        | -4.09  | 1.83E-01 | -42.57        | 5.02E-02        | -26.56       | 8.17E-02        |
| putamen                                 | -2.93         | 1.30E-01        | -5.08  | 7.42E-03 | -1.48         | 4.64E-01        | -4.86        | 1.37E-02        |
| thalamus                                | -5.07         | 5.06E-02        | -8.17  | 7.10E-04 | -5.28         | 3.10E-03        | <b>-9.39</b> | <b>1.80E-06</b> |
| pallidum                                | -5.16         | 2.87E-01        | -8.19  | 3.11E-02 | -0.04         | 9.44E-01        | 0.82         | 8.30E-01        |
| corpus callosum (np)                    | -1.49         | 5.23E-01        |        |          | 2.89          | 3.50E-01        |              |                 |
| substantia nigra                        | -8.46         | 1.94E-03        | -8.32  | 1.77E-03 | -30.25        | 1.25E-01        | -21.37       | 1.53E-01        |
| <i>Posterior fossa &amp; ventricles</i> |               |                 |        |          |               |                 |              |                 |
| cerebellum                              | -1.06         | 5.50E-01        | -1.00  | 5.59E-01 | -0.12         | 9.87E-01        | 1.53         | 5.15E-01        |
| brainstem (np)                          | -0.52         | 7.64E-01        |        |          | 0.82          | 7.07E-01        |              |                 |
| lat. ventricle, main                    | -16.64        | 2.15E-02        | -20.94 | 1.64E-02 | 21.50         | 2.33E-02        | 24.83        | 1.53E-02        |
| lat. ventricle, temp. horn              | -6.81         | 3.33E-01        | -7.26  | 7.89E-02 | -4.00         | 5.97E-01        | 7.42         | 2.34E-01        |
| third ventricle (np)                    | <b>-21.87</b> | <b>4.03E-04</b> |        |          | 27.26         | 7.41E-04        |              |                 |



**Supplementary Table E2.** Group differences for the DKT40 atlas database (left HS).

Group differences between healthy control (HC) subjects and left hippocampal sclerosis (LHS) patients for the DKT40 atlas set with the MAPER and FreeSurfer segmentation methods. Negative percentage difference values indicate smaller volumes in LHS than HC. Significant differences in structure volumes between HC and LHS groups (from the ANCOVA, after adjustment for 62 multiple comparisons) shown in bold. Abbreviations as in Supp. Table B1.

| Region                           | MAPER            |          |                 |          | FreeSurfer       |          |                 |                 |
|----------------------------------|------------------|----------|-----------------|----------|------------------|----------|-----------------|-----------------|
|                                  | Right Hemisphere |          | Left Hemisphere |          | Right Hemisphere |          | Left Hemisphere |                 |
|                                  | % diff           | p-value  | % diff          | p-value  | % diff           | p-value  | % diff          | p-value         |
| <i>Temporal lobe</i>             |                  |          |                 |          |                  |          |                 |                 |
| entorhinal cort.                 | 6.04             | 6.34E-02 | -8.91           | 5.26E-03 | 6.03             | 1.37E-01 | -14.62          | 1.04E-03        |
| parahippocampal gyr.             | 6.41             | 1.72E-02 | -4.13           | 1.62E-01 | 5.61             | 4.18E-02 | -7.02           | 5.53E-02        |
| sup. temp. gyr.                  | 0.65             | 6.05E-01 | -3.4            | 2.89E-02 | -4.92            | 4.70E-02 | <b>-12.22</b>   | <b>2.64E-06</b> |
| middle temp. gyr.                | 0.69             | 6.07E-01 | -6.16           | 5.59E-03 | -3.16            | 2.53E-01 | -8.05           | 1.73E-03        |
| inf. temp. gyr.                  | 2.4              | 1.95E-01 | -2.23           | 2.62E-01 | -1.99            | 5.26E-01 | -8.29           | 9.68E-04        |
| fusiform gyr.                    | -0.56            | 8.62E-01 | -1.01           | 6.83E-01 | -4.5             | 9.00E-02 | -7.05           | 1.97E-02        |
| transverse temp. gyr.            | 0.82             | 7.55E-01 | 4.06            | 3.88E-01 | 0.03             | 8.19E-01 | -4.64           | 2.95E-01        |
| <i>Insula and cingulate gyri</i> |                  |          |                 |          |                  |          |                 |                 |
| insula cort.                     | 1.6              | 2.50E-01 | -0.39           | 7.08E-01 | -2.61            | 3.14E-01 | -6.73           | 7.95E-03        |
| cingulate gyr., rostral ant.     | -4.18            | 1.96E-01 | -0.69           | 8.86E-01 | -3.89            | 3.05E-01 | -0.77           | 9.15E-01        |
| cingulate gyr., caudal ant.      | 1.4              | 5.14E-01 | -3.12           | 3.06E-01 | 2.84             | 4.21E-01 | -3.95           | 1.48E-01        |
| cingulate gyr., post.            | -1.08            | 8.73E-01 | -2.55           | 6.20E-01 | -3.21            | 2.10E-01 | -5.37           | 3.76E-02        |
| cingulate gyr., isthmus          | 4.24             | 2.48E-01 | -0.13           | 9.14E-01 | 2.28             | 3.85E-01 | 2.64            | 2.85E-01        |
| <i>Frontal lobe</i>              |                  |          |                 |          |                  |          |                 |                 |
| middle frontal gyr., rostral     | -2.42            | 4.33E-01 | -2.39           | 3.74E-01 | -5.92            | 5.80E-02 | <b>-9.95</b>    | <b>2.21E-04</b> |
| middle frontal gyr., caudal      | 0.33             | 7.91E-01 | 0.23            | 7.83E-01 | 2.69             | 2.71E-01 | -3.83           | 3.22E-01        |
| sup. frontal gyr.                | -2.78            | 1.43E-01 | -1.64           | 4.36E-01 | -6.27            | 6.34E-03 | -5.87           | 1.91E-02        |
| pars opercularis                 | -2.11            | 4.60E-01 | -1.98           | 4.69E-01 | -4.64            | 2.04E-01 | -4.74           | 2.26E-01        |
| pars triangularis                | 1.53             | 5.51E-01 | 4.94            | 7.36E-02 | -4.37            | 3.44E-01 | -1.4            | 8.90E-01        |
| pars orbitalis                   | -3.5             | 2.31E-01 | -2.51           | 4.16E-01 | -6.47            | 3.53E-02 | -5.52           | 4.63E-02        |
| lat. orbitofrontal               | 1.48             | 2.92E-01 | -1.38           | 3.83E-01 | 0.11             | 7.48E-01 | -2.96           | 1.48E-01        |
| med. orbitofrontal               | -1.5             | 4.36E-01 | 0.75            | 6.37E-01 | -3.43            | 1.94E-01 | -0.66           | 9.69E-01        |
| precentral gyr.                  | -0.31            | 8.85E-01 | -0.58           | 7.37E-01 | -7.4             | 1.02E-02 | -7.33           | 1.08E-02        |
| paracentral gyr.                 | -3.32            | 1.83E-01 | -2.2            | 3.97E-01 | -4.84            | 1.44E-01 | -1.22           | 8.49E-01        |
| <i>Occipital lobe</i>            |                  |          |                 |          |                  |          |                 |                 |

|                      |       |          |       |          |               |                 |       |          |
|----------------------|-------|----------|-------|----------|---------------|-----------------|-------|----------|
| lingual gyr.         | 1.5   | 4.20E-01 | -0.03 | 9.82E-01 | -0.12         | 9.10E-01        | -7.22 | 7.08E-02 |
| cuneus               | -4.81 | 1.04E-01 | -3.98 | 1.90E-01 | -6.62         | 2.52E-02        | -6.68 | 6.47E-02 |
| lat. occipital lobe  | 1.35  | 6.57E-01 | -2.01 | 5.39E-01 | -2.36         | 4.73E-01        | -4.19 | 2.12E-01 |
| pericalcarine cort.  | -6.49 | 1.65E-01 | -4.47 | 3.92E-01 | -9.33         | 1.18E-01        | -6.53 | 1.90E-01 |
| <i>Parietal lobe</i> |       |          |       |          |               |                 |       |          |
| postcentral gyr.     | -5.81 | 5.79E-03 | -2.22 | 2.52E-01 | <b>-11.89</b> | <b>3.79E-05</b> | -8.9  | 1.82E-03 |
| sup. parietal gyr.   | 2.91  | 1.02E-01 | 1.47  | 4.83E-01 | -2.71         | 4.49E-01        | -3.54 | 2.28E-01 |
| supramarginal gyr.   | -4.34 | 4.40E-02 | -1.67 | 5.11E-01 | -4.62         | 1.51E-01        | -5.28 | 9.23E-02 |
| inf. parietal gyr.   | -1.56 | 5.32E-01 | -3.97 | 1.15E-01 | -5.98         | 5.68E-02        | -9.13 | 1.86E-03 |
| precuneus            | -2.67 | 1.69E-01 | -3.73 | 6.77E-02 | -5.57         | 2.21E-02        | -5.13 | 7.20E-02 |

**Supplementary Table E3.** Group differences for the MGC2012 atlas database (left HS).

Group differences between healthy control (HC) subjects and left hippocampal sclerosis (LHS) patients for the MGC2012 atlas set with the MAPER and FreeSurfer segmentation methods. Negative percentage difference values indicate smaller volumes in LHS than HC. Significant differences in structure volumes between HC and LHS groups (from the ANCOVA, after adjustment for 132 multiple comparisons) shown in bold. Abbreviations as in Supp. Table B1.

| Region                           | MAPER            |          |                 |                 | FreeSurfer       |          |                 |                 |
|----------------------------------|------------------|----------|-----------------|-----------------|------------------|----------|-----------------|-----------------|
|                                  | Right Hemisphere |          | Left Hemisphere |                 | Right Hemisphere |          | Left Hemisphere |                 |
|                                  | % diff           | p-value  | % diff          | p-value         | % diff           | p-value  | % diff          | p-value         |
| <i>Temporal lobe</i>             |                  |          |                 |                 |                  |          |                 |                 |
| hippocampus                      | -4.80            | 3.18E-02 | <b>-23.01</b>   | <b>1.95E-17</b> | -5.10            | 1.53E-01 | <b>-29.67</b>   | <b>4.35E-21</b> |
| amygdala                         | -7.98            | 7.71E-03 | -2.20           | 4.58E-01        | -6.29            | 1.75E-01 | -6.89           | 5.26E-02        |
| entorhinal area                  | -6.95            | 2.03E-02 | -7.40           | 1.92E-02        | 0.52             | 8.43E-01 | <b>-18.73</b>   | <b>2.08E-04</b> |
| parahippocampal gyr.             | -6.94            | 1.63E-03 | -1.32           | 4.88E-01        | 2.94             | 2.69E-01 | <b>-11.62</b>   | <b>2.88E-05</b> |
| sup. temp. gyr.                  | -1.71            | 4.06E-01 | -1.36           | 5.62E-01        | -5.63            | 3.89E-02 | -10.01          | 1.05E-03        |
| middle temp. gyr.                | -1.67            | 3.50E-01 | -4.49           | 4.07E-02        | -2.99            | 2.81E-01 | -7.69           | 3.07E-03        |
| inf. temp. gyr.                  | -1.91            | 2.94E-01 | -0.99           | 6.22E-01        | -1.86            | 5.72E-01 | -7.92           | 2.13E-03        |
| fusiform gyr.                    | -0.98            | 6.19E-01 | -1.51           | 5.11E-01        | -4.90            | 6.83E-02 | -6.80           | 2.67E-02        |
| transverse temp. gyr.            | -0.73            | 7.93E-01 | -5.34           | 1.63E-01        | 0.02             | 8.29E-01 | -4.40           | 3.03E-01        |
| temporal pole                    | -2.50            | 2.28E-01 | -3.36           | 1.27E-01        | -4.71            | 1.44E-01 | <b>-16.85</b>   | <b>4.07E-07</b> |
| planum temporale                 | -3.76            | 2.39E-01 | -0.38           | 8.73E-01        | -4.86            | 2.31E-01 | -5.00           | 2.28E-01        |
| planum polare                    | -1.18            | 6.10E-01 | -6.80           | 1.17E-02        | -3.66            | 2.10E-01 | -9.40           | 9.31E-04        |
| <i>Insula and cingulate gyri</i> |                  |          |                 |                 |                  |          |                 |                 |
| ant. insula                      | -2.23            | 2.79E-01 | -1.81           | 4.19E-01        | -4.59            | 1.11E-01 | -7.62           | 6.42E-03        |
| post. insula                     | -1.37            | 4.80E-01 | -3.39           | 7.78E-02        | -0.66            | 9.32E-01 | -6.38           | 3.68E-02        |
| cingulate gyrus, ant.            | -1.07            | 7.45E-01 | -0.59           | 8.50E-01        | -2.74            | 4.83E-01 | -0.10           | 9.09E-01        |
| cingulate gyrus, middle          | -5.35            | 4.53E-02 | -0.22           | 9.28E-01        | -0.44            | 9.40E-01 | -6.24           | 3.14E-02        |
| cingulate gyrus, post.           | -2.55            | 2.25E-01 | -3.47           | 1.05E-01        | 0.58             | 7.06E-01 | 0.43            | 6.97E-01        |
| <i>Frontal lobe</i>              |                  |          |                 |                 |                  |          |                 |                 |
| middle frontal gyr.              | -0.78            | 5.49E-01 | -0.43           | 9.63E-01        | -2.84            | 3.91E-01 | -8.40           | 1.35E-03        |
| precentral gyr.                  | -2.20            | 1.99E-01 | -1.14           | 4.85E-01        | -6.94            | 2.07E-02 | -7.34           | 1.68E-02        |
| precentral gyr., med.            | -0.13            | 9.83E-01 | -0.38           | 9.03E-01        | -4.03            | 2.59E-01 | -0.77           | 9.53E-01        |
| sup. frontal gyr.                | -2.63            | 2.40E-01 | -0.56           | 7.71E-01        | -7.03            | 9.55E-03 | -4.45           | 1.39E-01        |
| sup. frontal gyr., med.          | -3.19            | 1.93E-01 | -4.63           | 8.42E-02        | -5.19            | 6.05E-02 | -8.16           | 4.68E-03        |
| med. frontal cort.               | -1.19            | 7.31E-01 | -4.07           | 2.15E-01        | -1.83            | 6.08E-01 | -0.08           | 9.08E-01        |

|                               |       |          |               |                 |               |                 |              |                 |
|-------------------------------|-------|----------|---------------|-----------------|---------------|-----------------|--------------|-----------------|
| inf. frontal gyr., opercular  | -2.11 | 5.50E-01 | -1.06         | 7.74E-01        | -5.63         | 2.07E-01        | -4.65        | 3.12E-01        |
| inf. frontal gyr., orbital    | -6.11 | 1.19E-01 | -2.06         | 5.47E-01        | -5.38         | 1.33E-01        | -7.43        | 9.55E-03        |
| inf. frontal gyr., triangular | -1.97 | 5.14E-01 | -7.55         | 1.10E-02        | -5.48         | 2.35E-01        | -2.44        | 6.64E-01        |
| frontal operculum             | -1.22 | 7.16E-01 | -0.87         | 7.99E-01        | -0.19         | 9.07E-01        | -2.40        | 6.11E-01        |
| frontal pole                  | -1.85 | 5.42E-01 | -0.54         | 8.86E-01        | -9.47         | 1.51E-02        | -6.73        | 1.51E-01        |
| central operculum             | -0.58 | 7.45E-01 | -0.18         | 8.81E-01        | -5.89         | 3.09E-02        | -7.64        | 8.55E-03        |
| ant. orbital gyr.             | -5.80 | 2.27E-02 | -2.79         | 2.68E-01        | 0.18          | 8.17E-01        | -2.91        | 4.01E-01        |
| post. orbital gyr.            | -0.18 | 9.32E-01 | -3.41         | 1.35E-01        | -2.10         | 5.57E-01        | -3.81        | 2.00E-01        |
| med. orbital gyr.             | -0.47 | 7.72E-01 | -1.79         | 3.61E-01        | 0.93          | 5.01E-01        | -1.62        | 5.35E-01        |
| lat. orbital gyr.             | -1.86 | 4.71E-01 | -2.59         | 3.68E-01        | -5.34         | 1.40E-01        | 0.02         | 7.89E-01        |
| supplementary motor cort.     | -4.26 | 1.19E-01 | -1.71         | 5.85E-01        | -4.67         | 1.41E-01        | -5.41        | 6.13E-02        |
| <i>Occipital lobe</i>         |       |          |               |                 |               |                 |              |                 |
| lingual gyr.                  | -2.75 | 2.61E-01 | -0.95         | 7.71E-01        | 0.78          | 6.58E-01        | -7.42        | 5.47E-02        |
| cuneus                        | -2.80 | 3.67E-01 | -3.49         | 2.61E-01        | -6.04         | 3.73E-02        | -7.04        | 5.10E-02        |
| sup. occipital gyr.           | -1.33 | 6.48E-01 | -1.56         | 6.22E-01        | -1.66         | 7.81E-01        | -4.04        | 3.36E-01        |
| middle occipital gyr.         | -0.80 | 8.01E-01 | -2.13         | 4.63E-01        | -7.91         | 5.48E-02        | -11.56       | 2.92E-03        |
| inf. occipital gyr.           | -0.72 | 8.38E-01 | -3.80         | 2.42E-01        | -5.02         | 1.85E-01        | -5.08        | 1.75E-01        |
| occipital pole                | -2.53 | 4.40E-01 | -3.42         | 3.16E-01        | -3.93         | 2.38E-01        | -0.10        | 9.64E-01        |
| occipital fusiform gyr.       | -6.89 | 1.18E-02 | -2.76         | 2.93E-01        | -0.16         | 9.46E-01        | -6.43        | 2.72E-01        |
| calcarine cort.               | -1.34 | 7.06E-01 | -1.46         | 7.13E-01        | -7.85         | 1.81E-01        | -3.54        | 4.76E-01        |
| <i>Parietal lobe</i>          |       |          |               |                 |               |                 |              |                 |
| gyrus rectus                  | -1.20 | 6.31E-01 | -2.24         | 3.13E-01        | -2.45         | 5.17E-01        | -4.19        | 2.13E-01        |
| postcentral gyr.              | -4.08 | 3.49E-02 | -1.39         | 4.92E-01        | <b>-13.03</b> | <b>3.69E-05</b> | -8.90        | 3.26E-03        |
| postcentral gyr., med.        | -8.65 | 9.94E-02 | -0.86         | 8.29E-01        | -9.55         | 2.71E-02        | -5.67        | 1.92E-01        |
| sup. parietal lobule          | -3.63 | 4.28E-02 | -4.58         | 2.63E-02        | -2.30         | 5.59E-01        | -3.81        | 2.06E-01        |
| supramarginal gyr.            | -5.50 | 4.70E-02 | -0.74         | 8.57E-01        | -6.44         | 7.05E-02        | -4.56        | 2.01E-01        |
| precuneus                     | -1.25 | 5.88E-01 | -2.54         | 2.67E-01        | -5.18         | 4.19E-02        | -5.21        | 7.13E-02        |
| parietal operculum            | -1.85 | 5.37E-01 | -3.35         | 1.91E-01        | -1.49         | 7.37E-01        | -5.87        | 1.40E-01        |
| angular gyrus                 | -0.63 | 8.14E-01 | -2.97         | 2.39E-01        | -4.94         | 1.83E-01        | -8.19        | 8.88E-03        |
| <i>Central structures</i>     |       |          |               |                 |               |                 |              |                 |
| caudate                       | -2.03 | 5.30E-01 | -1.00         | 6.03E-01        | -4.05         | 4.03E-01        | -3.10        | 2.94E-01        |
| accumbens area                | -1.90 | 6.23E-01 | -2.65         | 4.30E-01        | -2.47         | 5.82E-01        | -6.90        | 1.06E-01        |
| putamen                       | -0.66 | 8.32E-01 | -2.72         | 2.51E-01        | -1.39         | 5.01E-01        | -5.07        | 1.12E-02        |
| thalamus (proper)             | -7.18 | 3.16E-03 | <b>-10.23</b> | <b>1.67E-05</b> | -4.18         | 1.08E-02        | <b>-7.12</b> | <b>1.22E-04</b> |
| pallidum                      | -0.28 | 8.73E-01 | -1.05         | 6.48E-01        | -0.42         | 8.18E-01        | -1.37        | 5.89E-01        |

|                                                       |               |                 |        |          |        |          |       |          |
|-------------------------------------------------------|---------------|-----------------|--------|----------|--------|----------|-------|----------|
| ventral diencephalon                                  | -1.16         | 3.61E-01        | -2.97  | 2.22E-02 | -3.42  | 3.52E-02 | -3.78 | 1.54E-02 |
| optic chiasm (np)                                     | -4.42         | 9.27E-02        |        |          | -10.80 | 1.13E-01 |       |          |
| subcallosal area                                      | -0.82         | 7.99E-01        | -0.35  | 8.37E-01 | -1.49  | 7.30E-01 | -1.81 | 7.46E-01 |
| <i>Posterior fossa, ventricles &amp; white matter</i> |               |                 |        |          |        |          |       |          |
| cerebellum exterior                                   | -1.24         | 4.72E-01        | -1.26  | 4.59E-01 | 2.32   | 4.55E-01 | 4.69  | 1.58E-01 |
| cerebellar vermal lobules I-V (np)                    | -2.32         | 4.16E-01        |        |          | -0.15  | 9.90E-01 |       |          |
| cerebellar vermal lobules VI-VII (np)                 | -0.80         | 8.82E-01        |        |          | -3.81  | 4.44E-01 |       |          |
| cerebellar vermal lobules VIII-X (np)                 | -0.61         | 8.59E-01        |        |          | 5.99   | 2.09E-01 |       |          |
| brainstem (np)                                        | -0.23         | 9.31E-01        |        |          | 0.22   | 9.49E-01 |       |          |
| lateral ventricle                                     | -18.82        | 2.90E-02        | -22.66 | 1.67E-02 | 21.38  | 2.34E-02 | 24.41 | 1.36E-02 |
| inf. lateral ventricle                                | -10.72        | 2.85E-01        | -18.76 | 2.38E-03 | 6.13   | 5.06E-01 | 13.65 | 2.04E-02 |
| third ventricle (np)                                  | <b>-26.03</b> | <b>1.90E-04</b> |        |          | 23.40  | 1.45E-03 |       |          |
| fourth ventricle (np)                                 | -6.82         | 1.73E-01        |        |          | 6.44   | 2.55E-01 |       |          |
| cerebrospinal fluid (np)                              | -12.52        | 9.92E-02        |        |          | 20.64  | 3.91E-03 |       |          |
| cerebral white matter                                 | -2.24         | 8.78E-02        | -4.55  | 4.29E-04 | 3.17   | 1.98E-01 | 1.67  | 6.38E-01 |
| cerebellar white matter                               | -5.68         | 9.87E-02        | -4.79  | 1.24E-01 | -3.20  | 6.32E-01 | -0.79 | 8.98E-01 |

**Supplementary Table E4.** Group differences for the HM atlas database (right HS).

Group differences between healthy control (HC) subjects and right hippocampal sclerosis (RHS) patients for the HM atlas set with the MAPER and FreeSurfer segmentation methods. Negative percentage difference values indicate smaller volumes in RHS than HC. Significant differences in structure volumes between HC and RHS groups (from the ANCOVA, after adjustment for 93 multiple comparisons) shown in bold. Abbreviations as in Supp. Table B1.

| Region                           | MAPER            |                 |                 |          | FreeSurfer       |                 |                 |          |
|----------------------------------|------------------|-----------------|-----------------|----------|------------------|-----------------|-----------------|----------|
|                                  | Right Hemisphere |                 | Left Hemisphere |          | Right Hemisphere |                 | Left Hemisphere |          |
|                                  | % diff           | p-value         | % diff          | p-value  | % diff           | p-value         | % diff          | p-value  |
| <i>Temporal lobe</i>             |                  |                 |                 |          |                  |                 |                 |          |
| hippocampus                      | <b>-36.23</b>    | <b>1.67E-15</b> | -3.95           | 9.60E-02 | <b>-38.12</b>    | <b>6.70E-12</b> | 1.69            | 4.50E-01 |
| amygdala                         | -2.05            | 8.64E-01        | -7.26           | 1.35E-02 | -12.78           | 9.81E-03        | 3.17            | 3.54E-01 |
| ant. temp. lobe, med.            | -2.40            | 2.45E-01        | -7.08           | 6.00E-02 | -11.91           | 7.52E-04        | -2.41           | 3.76E-01 |
| ant. temp. lobe, lat.            | -4.23            | 2.41E-01        | -3.87           | 2.93E-01 | -2.60            | 5.62E-01        | 2.37            | 6.92E-01 |
| parahippocampal gyr.             | -3.61            | 2.96E-01        | -6.79           | 1.20E-02 | -10.78           | 4.02E-03        | -3.15           | 3.02E-01 |
| sup. temp. gyr., post.           | -1.93            | 9.18E-01        | -0.45           | 6.09E-01 | -2.90            | 4.23E-01        | -1.78           | 7.62E-01 |
| middle & inf. temp. gyr.         | -3.06            | 3.52E-01        | -4.47           | 5.55E-02 | -3.67            | 2.83E-01        | 0.40            | 7.79E-01 |
| fusiform gyr.                    | -1.17            | 9.18E-01        | -8.78           | 3.50E-03 | -5.73            | 3.14E-01        | -0.42           | 9.98E-01 |
| post. temp. lobe                 | -4.49            | 4.45E-02        | -0.17           | 6.77E-01 | -5.06            | 2.41E-02        | -3.54           | 8.41E-02 |
| sup. temp. gyr., ant.            | -9.69            | 2.78E-02        | -4.00           | 2.03E-01 | -13.89           | 1.10E-03        | 0.12            | 9.45E-01 |
| <i>Insula and cingulate gyri</i> |                  |                 |                 |          |                  |                 |                 |          |
| insula, post. long gyr.          | -0.31            | 2.73E-01        | -4.49           | 1.35E-02 | 8.82             | 1.06E-02        | 0.11            | 8.18E-01 |
| insula, ant. short gyr.          | -2.43            | 1.64E-01        | -1.50           | 2.42E-01 | 2.32             | 5.10E-01        | 2.21            | 5.94E-01 |
| insula, middle short gyr.        | -13.57           | 7.86E-03        | -5.72           | 3.82E-01 | -5.09            | 3.10E-01        | 2.75            | 4.94E-01 |
| insula, post. short gyr.         | -3.50            | 9.75E-01        | -3.70           | 9.37E-01 | -0.02            | 9.36E-01        | -4.22           | 3.18E-01 |
| insula, ant. inf. cort.          | -3.01            | 8.23E-01        | -5.09           | 4.99E-02 | -8.09            | 3.02E-02        | -1.93           | 3.58E-01 |
| insula, ant. long gyr.           | -3.36            | 9.39E-01        | -5.80           | 4.29E-01 | -2.90            | 3.72E-01        | -3.38           | 5.38E-01 |
| cingulate gyrus, ant.            | -0.08            | 7.90E-01        | -1.02           | 9.09E-01 | -1.19            | 9.71E-01        | -2.53           | 6.52E-01 |
| cingulate gyrus, post.           | -0.53            | 5.97E-01        | -2.93           | 7.25E-01 | -2.95            | 2.20E-01        | 0.01            | 9.63E-01 |
| <i>Frontal lobe</i>              |                  |                 |                 |          |                  |                 |                 |          |
| middle frontal gyr.              | -2.89            | 7.61E-01        | -1.41           | 6.89E-01 | -2.74            | 3.44E-01        | -0.57           | 8.70E-01 |
| precentral gyr.                  | -4.90            | 4.35E-01        | -4.56           | 4.69E-01 | -6.43            | 3.02E-02        | -5.74           | 4.40E-02 |
| ant. orbital gyr.                | -3.94            | 6.63E-02        | -3.69           | 4.31E-02 | 1.25             | 5.96E-01        | 0.44            | 7.25E-01 |
| inf. frontal gyr.                | -0.52            | 2.90E-01        | -1.66           | 8.95E-01 | -3.27            | 3.01E-01        | -1.34           | 7.63E-01 |
| sup. frontal gyr.                | -2.38            | 3.71E-01        | -0.60           | 6.50E-01 | -4.75            | 7.37E-02        | -1.16           | 7.19E-01 |

|                                         |        |          |        |          |              |                 |       |          |
|-----------------------------------------|--------|----------|--------|----------|--------------|-----------------|-------|----------|
| med. orbital gyr.                       | -0.25  | 3.81E-01 | -2.86  | 5.74E-02 | 0.04         | 8.09E-01        | -1.92 | 5.84E-01 |
| lat. orbital gyr.                       | -2.74  | 2.49E-01 | -2.96  | 3.78E-01 | -0.66        | 7.71E-01        | -1.37 | 5.25E-01 |
| post. orbital gyr.                      | -3.00  | 9.73E-02 | -2.97  | 1.67E-01 | 0.07         | 9.17E-01        | 1.93  | 4.37E-01 |
| subgenual frontal cort.                 | -6.01  | 1.92E-01 | -10.33 | 2.12E-02 | -0.46        | 9.20E-01        | 2.91  | 5.43E-01 |
| pre-subgenual frontal cort.             | -1.08  | 8.28E-01 | -5.62  | 3.27E-01 | -5.06        | 3.52E-01        | 0.35  | 7.91E-01 |
| <i>Occipital lobe</i>                   |        |          |        |          |              |                 |       |          |
| lingual gyr.                            | -2.80  | 7.63E-01 | -2.39  | 9.58E-01 | -3.53        | 4.32E-01        | -0.55 | 7.67E-01 |
| cuneus                                  | -8.22  | 2.29E-01 | -5.83  | 5.68E-01 | -2.83        | 3.75E-01        | -0.47 | 9.50E-01 |
| occipital lobe                          | -2.92  | 4.88E-01 | -0.71  | 9.68E-01 | -3.91        | 6.54E-02        | -0.78 | 5.85E-01 |
| <i>Parietal lobe</i>                    |        |          |        |          |              |                 |       |          |
| straight gyr.                           | -1.70  | 3.20E-01 | -3.59  | 6.84E-02 | 0.41         | 7.35E-01        | 1.65  | 5.14E-01 |
| postcentral gyr.                        | -6.91  | 6.09E-02 | -4.84  | 3.45E-01 | -9.81        | 5.67E-04        | -5.93 | 3.65E-02 |
| sup. parietal gyr.                      | -3.73  | 3.34E-01 | -1.99  | 8.49E-01 | -3.27        | 1.99E-01        | -1.71 | 4.77E-01 |
| supramarginal gyr.                      | -5.43  | 1.59E-01 | -2.52  | 6.52E-01 | 0.43         | 9.96E-01        | 0.19  | 9.29E-01 |
| angular gyr.                            | -5.38  | 2.45E-01 | -4.30  | 3.81E-01 | -4.90        | 1.08E-01        | -5.05 | 1.12E-01 |
| <i>Central structures</i>               |        |          |        |          |              |                 |       |          |
| caudate nucleus                         | -3.42  | 2.04E-01 | -2.01  | 4.87E-01 | -3.03        | 3.10E-01        | -0.65 | 7.26E-01 |
| nucleus accumbens                       | -0.26  | 6.88E-01 | -0.65  | 8.38E-01 | -12.47       | 2.78E-01        | -0.58 | 5.09E-01 |
| putamen                                 | -5.68  | 4.14E-02 | -3.26  | 3.36E-01 | -5.11        | 6.59E-02        | -2.32 | 4.83E-01 |
| thalamus                                | -6.52  | 4.94E-03 | -2.27  | 2.28E-01 | <b>-9.23</b> | <b>1.41E-05</b> | -1.63 | 5.31E-01 |
| pallidum                                | -9.44  | 1.32E-01 | -8.25  | 7.33E-02 | -6.80        | 2.58E-01        | -4.19 | 7.36E-01 |
| corpus callosum (np)                    | -0.82  | 5.31E-01 |        |          | -2.72        | 5.75E-01        |       |          |
| substantia nigra                        | -5.69  | 4.62E-02 | -1.98  | 3.80E-01 | -21.24       | 2.37E-01        | -6.98 | 6.22E-01 |
| <i>Posterior fossa &amp; ventricles</i> |        |          |        |          |              |                 |       |          |
| cerebellum                              | -1.72  | 6.62E-01 | -2.55  | 3.75E-01 | -0.57        | 9.42E-01        | -1.23 | 9.82E-01 |
| brainstem (np)                          | -0.54  | 5.89E-01 |        |          | 2.65         | 1.76E-01        |       |          |
| lat. ventricle, main                    | -7.15  | 5.12E-01 | -4.80  | 7.84E-01 | 15.26        | 2.48E-01        | 8.58  | 6.32E-01 |
| lat. ventricle, temp. horn              | -5.08  | 5.27E-01 | -0.43  | 8.08E-01 | -3.19        | 5.99E-01        | -2.98 | 7.42E-01 |
| third ventricle (np)                    | -13.43 | 1.69E-01 |        |          | 17.31        | 1.69E-01        |       |          |

**Supplementary Table E5.** Group differences for the DKT40 atlas database (right HS).

Group differences between healthy control (HC) subjects and right hippocampal sclerosis (RHS) patients for the DKT40 atlas set with the MAPER and FreeSurfer segmentation methods. Negative percentage difference values indicate smaller volumes in RHS than HC. Significant differences in structure volumes between HC and RHS groups (from the ANCOVA, after adjustment for 62 multiple comparisons) shown in bold. Abbreviations as in Supp. Table B1.

| Region                           | MAPER            |          |                 |          | FreeSurfer       |          |                 |          |
|----------------------------------|------------------|----------|-----------------|----------|------------------|----------|-----------------|----------|
|                                  | Right Hemisphere |          | Left Hemisphere |          | Right Hemisphere |          | Left Hemisphere |          |
|                                  | % diff           | p-value  | % diff          | p-value  | % diff           | p-value  | % diff          | p-value  |
| <i>Temporal lobe</i>             |                  |          |                 |          |                  |          |                 |          |
| entorhinal cort.                 | 4.18             | 6.23E-01 | 8.85            | 4.39E-02 | -2.07            | 5.50E-01 | -6.10           | 2.87E-02 |
| parahippocampal gyr.             | -9.99            | 1.62E-02 | -0.79           | 9.11E-01 | -0.75            | 7.02E-01 | -7.01           | 1.22E-01 |
| sup. temp. gyr.                  | -3.08            | 1.57E-01 | -0.04           | 7.50E-01 | 0.55             | 9.29E-01 | -5.30           | 4.37E-01 |
| middle temp. gyr.                | -6.01            | 1.88E-02 | -1.34           | 6.96E-01 | -1.14            | 6.92E-01 | -4.60           | 1.14E-01 |
| inf. temp. gyr.                  | -2.42            | 2.20E-01 | 3.93            | 1.56E-01 | 1.52             | 5.85E-01 | -5.80           | 3.21E-02 |
| fusiform gyr.                    | -2.89            | 2.71E-01 | -0.03           | 7.74E-01 | -3.07            | 5.58E-01 | -6.27           | 2.96E-02 |
| transverse temp. gyr.            | 5.26             | 3.40E-01 | 5.60            | 5.36E-01 | -1.76            | 9.65E-01 | 1.67            | 4.86E-01 |
| <i>Insula and cingulate gyri</i> |                  |          |                 |          |                  |          |                 |          |
| insula cort.                     | -0.48            | 7.38E-01 | 1.25            | 1.10E-01 | -1.50            | 9.89E-01 | -2.08           | 4.99E-01 |
| cingulate gyr., rostral ant.     | -4.47            | 3.24E-01 | 1.46            | 4.76E-01 | -1.80            | 8.75E-01 | -1.93           | 3.40E-01 |
| cingulate gyr., caudal ant.      | 3.14             | 2.53E-01 | -0.86           | 7.09E-01 | 3.19             | 5.07E-01 | -11.13          | 6.09E-04 |
| cingulate gyr., post.            | 1.30             | 8.49E-01 | 1.99            | 9.75E-01 | -0.01            | 8.29E-01 | -4.21           | 2.89E-01 |
| cingulate gyr., isthmus          | 0.38             | 6.65E-01 | 1.94            | 7.46E-01 | 0.96             | 5.86E-01 | -5.24           | 4.73E-02 |
| <i>Frontal lobe</i>              |                  |          |                 |          |                  |          |                 |          |
| middle frontal gyr., rostral     | -1.57            | 5.23E-01 | 2.01            | 3.50E-01 | -0.65            | 8.91E-01 | 1.64            | 3.43E-01 |
| middle frontal gyr., caudal      | 6.46             | 1.76E-01 | 5.55            | 2.07E-01 | -1.71            | 5.10E-01 | -6.83           | 1.31E-02 |
| sup. frontal gyr.                | -0.93            | 6.06E-01 | 2.15            | 3.38E-01 | -0.44            | 9.14E-01 | -2.65           | 3.85E-01 |
| pars opercularis                 | -1.51            | 9.25E-01 | -2.50           | 6.26E-01 | -0.84            | 7.15E-01 | -3.48           | 1.78E-01 |
| pars triangularis                | 0.84             | 5.35E-01 | 5.93            | 5.30E-02 | -1.06            | 7.47E-01 | 2.71            | 2.12E-01 |
| pars orbitalis                   | 0.55             | 6.77E-01 | -2.03           | 6.87E-01 | -2.03            | 7.47E-01 | -4.37           | 1.87E-01 |
| lat. orbitofrontal               | 1.57             | 1.64E-01 | 1.49            | 1.65E-01 | -1.37            | 6.20E-01 | -6.08           | 5.59E-02 |
| med. orbitofrontal               | 1.17             | 2.50E-01 | 2.52            | 1.35E-01 | -1.89            | 6.25E-01 | -4.54           | 7.20E-02 |
| precentral gyr.                  | -1.73            | 4.14E-01 | -2.15           | 2.91E-01 | -0.63            | 8.36E-01 | -2.28           | 3.23E-01 |
| paracentral gyr.                 | -3.39            | 1.62E-01 | -2.25           | 3.48E-01 | -1.27            | 7.08E-01 | -4.04           | 1.67E-01 |
| <i>Occipital lobe</i>            |                  |          |                 |          |                  |          |                 |          |



|                      |       |          |       |          |             |                 |       |          |
|----------------------|-------|----------|-------|----------|-------------|-----------------|-------|----------|
| lingual gyr.         | -0.43 | 9.00E-01 | -0.22 | 8.09E-01 | -1.23       | 6.22E-01        | -4.78 | 6.36E-02 |
| cuneus               | -7.37 | 1.02E-01 | -5.01 | 3.72E-01 | -2.12       | 5.35E-01        | -7.17 | 2.11E-02 |
| lat. occipital lobe  | 0.81  | 7.89E-01 | 2.42  | 5.88E-01 | -1.45       | 6.08E-01        | -4.79 | 4.73E-02 |
| pericalcarine cort.  | -7.74 | 2.55E-01 | 0.65  | 7.62E-01 | -1.07       | 7.53E-01        | -4.11 | 2.63E-01 |
| <i>Parietal lobe</i> |       |          |       |          |             |                 |       |          |
| postcentral gyr.     | -4.55 | 1.01E-01 | -0.60 | 9.63E-01 | <b>1.79</b> | <b>7.86E-01</b> | -3.02 | 2.63E-01 |
| sup. parietal gyr.   | 0.89  | 5.82E-01 | 0.24  | 9.08E-01 | 0.27        | 9.27E-01        | -3.84 | 4.16E-01 |
| supramarginal gyr.   | -3.21 | 2.05E-01 | -0.38 | 9.52E-01 | -1.54       | 9.29E-01        | -2.05 | 4.53E-01 |
| inf. parietal gyr.   | -3.24 | 2.20E-01 | -1.84 | 5.38E-01 | 1.30        | 5.59E-01        | -8.71 | 3.09E-02 |
| precuneus            | -4.32 | 7.29E-02 | -3.72 | 2.15E-01 | -0.21       | 8.50E-01        | -2.00 | 3.28E-01 |

**Supplementary Table E6.** Group differences for the MGC2012 atlas database (right HS).

Group differences between healthy control (HC) subjects and right hippocampal sclerosis (RHS) patients for the MGC2012 atlas set with the MAPER and FreeSurfer segmentation methods. Negative percentage difference values indicate smaller volumes in RHS than HC. Significant differences in structure volumes between HC and RHS groups (from the ANCOVA, after adjustment for 132 multiple comparisons) shown in bold. Abbreviations as in Supp. Table B1.

| Region                           | MAPER            |                 |                 |          | FreeSurfer       |                 |                 |          |
|----------------------------------|------------------|-----------------|-----------------|----------|------------------|-----------------|-----------------|----------|
|                                  | Right Hemisphere |                 | Left Hemisphere |          | Right Hemisphere |                 | Left Hemisphere |          |
|                                  | % diff           | p-value         | % diff          | p-value  | % diff           | p-value         | % diff          | p-value  |
| <i>Temporal lobe</i>             |                  |                 |                 |          |                  |                 |                 |          |
| hippocampus                      | <b>-27.25</b>    | <b>3.58E-15</b> | -3.19           | 7.31E-02 | <b>-38.33</b>    | <b>4.89E-13</b> | 0.74            | 5.60E-01 |
| amygdala                         | -0.06            | 6.72E-01        | -9.39           | 2.97E-03 | -8.66            | 1.21E-01        | 6.00            | 7.48E-02 |
| entorhinal area                  | -4.50            | 2.86E-01        | -10.02          | 9.97E-03 | -13.57           | 1.09E-02        | -7.24           | 8.72E-02 |
| parahippocampal gyr.             | -2.78            | 4.44E-01        | -6.15           | 6.02E-03 | -9.61            | 8.91E-03        | -2.37           | 4.15E-01 |
| sup. temp. gyr.                  | -3.33            | 3.88E-01        | -3.04           | 5.26E-01 | -5.37            | 8.13E-02        | -2.47           | 5.10E-01 |
| middle temp. gyr.                | -7.06            | 1.88E-02        | -2.22           | 6.78E-01 | -4.97            | 4.02E-02        | -2.78           | 2.21E-01 |
| inf. temp. gyr.                  | -4.68            | 5.25E-02        | -1.66           | 4.74E-01 | -5.43            | 4.42E-02        | -1.14           | 6.02E-01 |
| fusiform gyr.                    | -2.86            | 4.70E-01        | -0.75           | 4.48E-01 | -5.06            | 1.06E-01        | -0.34           | 9.33E-01 |
| transverse temp. gyr.            | -3.04            | 1.85E-01        | -6.57           | 1.08E-01 | -1.48            | 9.34E-01        | -1.73           | 9.09E-01 |
| temporal pole                    | -4.73            | 5.85E-02        | -3.38           | 2.11E-01 | -10.49           | 2.01E-03        | -0.49           | 7.29E-01 |
| planum temporale                 | -3.76            | 1.73E-01        | -0.16           | 7.43E-01 | -1.41            | 8.62E-01        | -3.07           | 5.76E-01 |
| planum polare                    | -4.62            | 4.47E-01        | -3.05           | 7.38E-01 | -4.73            | 1.99E-01        | 1.19            | 6.16E-01 |
| <i>Insula and cingulate gyri</i> |                  |                 |                 |          |                  |                 |                 |          |
| ant. insula                      | -2.16            | 9.78E-01        | -2.58           | 4.42E-02 | -4.14            | 1.35E-01        | -0.61           | 6.72E-01 |
| post. insula                     | -0.72            | 7.60E-01        | -2.69           | 6.72E-01 | 3.38             | 2.38E-01        | -2.48           | 5.78E-01 |
| cingulate gyrus, ant.            | -1.54            | 8.71E-01        | -1.23           | 9.01E-01 | -3.00            | 6.47E-01        | -2.22           | 6.02E-01 |
| cingulate gyrus, middle          | -3.12            | 4.63E-01        | -0.81           | 7.49E-01 | -2.84            | 3.95E-01        | -1.26           | 8.27E-01 |
| cingulate gyrus, post.           | -2.16            | 3.38E-01        | -0.11           | 8.69E-01 | -0.82            | 7.43E-01        | 0.14            | 9.46E-01 |
| <i>Frontal lobe</i>              |                  |                 |                 |          |                  |                 |                 |          |
| middle frontal gyr.              | -1.57            | 3.20E-01        | -2.34           | 1.02E-01 | -2.80            | 3.42E-01        | -0.94           | 7.74E-01 |
| precentral gyr.                  | -0.39            | 8.50E-01        | -2.69           | 3.62E-01 | -6.74            | 3.89E-02        | -7.07           | 2.24E-02 |
| precentral gyr., med.            | -4.24            | 1.92E-01        | -2.85           | 5.64E-01 | -3.97            | 2.34E-01        | -2.26           | 5.32E-01 |
| sup. frontal gyr.                | -1.87            | 5.40E-01        | -5.66           | 4.34E-02 | -4.92            | 1.20E-01        | -0.27           | 9.98E-01 |
| sup. frontal gyr., med.          | -5.18            | 1.23E-01        | -1.65           | 8.97E-01 | -3.81            | 1.84E-01        | -2.17           | 4.83E-01 |
| med. frontal cort.               | -0.84            | 4.63E-01        | -2.77           | 2.82E-01 | 1.37             | 5.74E-01        | 6.50            | 3.33E-02 |

|                               |              |                 |       |          |              |                 |       |          |
|-------------------------------|--------------|-----------------|-------|----------|--------------|-----------------|-------|----------|
| inf. frontal gyr., opercular  | -0.83        | 7.72E-01        | -3.01 | 7.59E-01 | -2.39        | 4.66E-01        | -5.50 | 2.36E-01 |
| inf. frontal gyr., orbital    | -6.24        | 3.27E-01        | -1.24 | 8.88E-01 | -3.79        | 3.93E-01        | -3.97 | 1.62E-01 |
| inf. frontal gyr., triangular | -2.93        | 1.66E-01        | -5.36 | 5.59E-02 | -4.12        | 3.77E-01        | 0.58  | 7.34E-01 |
| frontal operculum             | -5.46        | 5.22E-01        | -2.72 | 1.87E-01 | -0.13        | 7.87E-01        | 1.47  | 5.88E-01 |
| frontal pole                  | -2.24        | 3.04E-01        | -4.09 | 1.05E-01 | -8.81        | 5.13E-02        | 0.38  | 8.96E-01 |
| central operculum             | -0.36        | 4.83E-01        | -1.26 | 6.25E-01 | -3.31        | 2.24E-01        | -3.64 | 2.56E-01 |
| ant. orbital gyr.             | -7.63        | 1.05E-02        | -2.60 | 3.58E-01 | -0.34        | 9.11E-01        | -1.55 | 7.44E-01 |
| post. orbital gyr.            | -0.07        | 8.33E-01        | -1.43 | 8.60E-01 | 1.87         | 5.07E-01        | 1.58  | 5.08E-01 |
| med. orbital gyr.             | -0.52        | 6.15E-01        | -1.08 | 2.50E-01 | 0.67         | 6.01E-01        | -0.22 | 6.75E-01 |
| lat. orbital gyr.             | -2.29        | 3.76E-01        | -2.46 | 4.15E-01 | -2.09        | 4.97E-01        | 0.74  | 9.90E-01 |
| supplementary motor cort.     | -3.22        | 3.87E-01        | -0.14 | 9.45E-01 | -3.65        | 2.80E-01        | -1.35 | 6.60E-01 |
| <i>Occipital lobe</i>         |              |                 |       |          |              |                 |       |          |
| lingual gyr.                  | -0.20        | 5.89E-01        | -0.15 | 4.65E-01 | -4.52        | 1.89E-01        | -1.51 | 5.87E-01 |
| cuneus                        | -3.62        | 7.17E-01        | -3.16 | 8.20E-01 | -0.77        | 8.70E-01        | 1.10  | 6.98E-01 |
| sup. occipital gyr.           | -0.04        | 6.07E-01        | -0.88 | 4.95E-01 | 2.34         | 6.77E-01        | -1.11 | 6.45E-01 |
| middle occipital gyr.         | -3.05        | 5.14E-01        | -2.13 | 4.72E-01 | -9.46        | 1.19E-02        | -7.64 | 2.68E-02 |
| inf. occipital gyr.           | -1.97        | 7.36E-01        | -0.33 | 9.89E-01 | -8.62        | 1.51E-02        | 2.02  | 7.92E-01 |
| occipital pole                | -0.79        | 8.80E-01        | -1.55 | 6.04E-01 | 3.58         | 4.16E-01        | 9.63  | 2.45E-02 |
| occipital fusiform gyr.       | -1.82        | 9.28E-01        | -2.49 | 6.93E-01 | 2.13         | 6.88E-01        | 0.05  | 9.01E-01 |
| calcarine cort.               | -5.39        | 5.84E-01        | -1.24 | 8.68E-01 | -3.98        | 5.64E-01        | -0.94 | 8.43E-01 |
| <i>Parietal lobe</i>          |              |                 |       |          |              |                 |       |          |
| gyrus rectus                  | -2.29        | 7.82E-01        | -0.98 | 4.61E-01 | 0.13         | 7.80E-01        | -1.02 | 7.02E-01 |
| postcentral gyr.              | -4.16        | 1.91E-01        | -0.30 | 7.28E-01 | -12.66       | 4.39E-04        | -6.17 | 6.43E-02 |
| postcentral gyr., med.        | -8.98        | 2.83E-01        | -1.81 | 4.59E-01 | -10.69       | 4.09E-02        | -8.38 | 1.12E-01 |
| sup. parietal lobule          | -1.24        | 3.07E-01        | -4.14 | 4.07E-02 | -1.10        | 7.51E-01        | -1.17 | 6.41E-01 |
| supramarginal gyr.            | -4.79        | 2.01E-01        | -1.18 | 8.31E-01 | -3.76        | 1.88E-01        | 0.54  | 8.99E-01 |
| precuneus                     | -3.47        | 4.04E-01        | -3.30 | 4.97E-01 | -4.52        | 7.94E-02        | -2.54 | 3.31E-01 |
| parietal operculum            | -5.46        | 4.23E-02        | -1.72 | 4.93E-01 | 11.87        | 2.29E-03        | -1.16 | 9.53E-01 |
| angular gyrus                 | -5.53        | 8.19E-02        | -3.04 | 5.12E-01 | -3.80        | 1.83E-01        | -4.88 | 1.13E-01 |
| <i>Central structures</i>     |              |                 |       |          |              |                 |       |          |
| caudate                       | -5.19        | 1.85E-01        | -3.22 | 4.63E-01 | -1.74        | 5.20E-01        | -1.40 | 5.57E-01 |
| accumbens area                | -2.93        | 5.37E-01        | -1.25 | 5.82E-01 | -2.33        | 9.85E-01        | -1.06 | 6.25E-01 |
| putamen                       | -7.86        | 2.09E-02        | -5.15 | 2.85E-01 | -5.44        | 4.38E-02        | -2.18 | 5.53E-01 |
| thalamus (proper)             | <b>-9.21</b> | <b>2.34E-04</b> | -3.51 | 1.34E-01 | <b>-8.18</b> | <b>2.21E-05</b> | -1.25 | 6.83E-01 |
| pallidum                      | -3.17        | 4.07E-01        | -4.32 | 1.94E-01 | -6.13        | 1.92E-01        | -5.14 | 3.61E-01 |

|                                                       |        |          |       |          |       |          |       |          |
|-------------------------------------------------------|--------|----------|-------|----------|-------|----------|-------|----------|
| ventral diencephalon                                  | -2.83  | 1.40E-01 | -1.03 | 9.05E-01 | -2.21 | 2.60E-01 | 0.00  | 9.70E-01 |
| optic chiasm (np)                                     | -0.21  | 8.75E-01 |       |          | -8.90 | 1.62E-01 |       |          |
| subcallosal area                                      | -3.55  | 1.73E-01 | -5.02 | 7.02E-02 | -0.32 | 8.43E-01 | 0.89  | 8.59E-01 |
| <i>Posterior fossa, ventricles &amp; white matter</i> |        |          |       |          |       |          |       |          |
| cerebellum exterior                                   | -0.87  | 4.54E-01 | -0.12 | 7.17E-01 | 1.09  | 8.03E-01 | 6.87  | 4.45E-02 |
| cerebellar vermal lobules I-V (np)                    | -0.33  | 6.06E-01 |       |          | 6.48  | 2.34E-01 |       |          |
| cerebellar vermal lobules VI-VII (np)                 | -0.45  | 3.64E-01 |       |          | -9.64 | 1.80E-01 |       |          |
| cerebellar vermal lobules VIII-X (np)                 | -1.69  | 7.53E-01 |       |          | 4.05  | 2.68E-01 |       |          |
| brainstem (np)                                        | -0.86  | 5.22E-01 |       |          | 3.67  | 8.22E-02 |       |          |
| lateral ventricle                                     | -12.46 | 2.95E-01 | -6.53 | 6.93E-01 | 15.53 | 2.35E-01 | 8.69  | 6.08E-01 |
| inf. lateral ventricle                                | -13.39 | 2.26E-01 | -2.51 | 7.84E-01 | 19.75 | 4.21E-02 | -3.32 | 3.57E-01 |
| third ventricle (np)                                  | -15.88 | 1.39E-01 |       |          | 14.48 | 2.44E-01 |       |          |
| fourth ventricle (np)                                 | -0.04  | 7.27E-01 |       |          | -1.26 | 8.29E-01 |       |          |
| cerebrospinal fluid (np)                              | -4.84  | 7.57E-01 |       |          | 6.75  | 4.50E-01 |       |          |
| cerebral white matter                                 | -3.84  | 6.44E-03 | -1.42 | 2.81E-01 | -0.28 | 7.88E-01 | 2.49  | 1.94E-01 |
| cerebellar white matter                               | -7.76  | 8.85E-02 | -7.09 | 1.19E-01 | -2.48 | 9.96E-01 | -9.29 | 1.62E-01 |

## Supplementary Figure S1. Boxplots of Jaccard overlaps for the HM atlas database.

Boxplots of JC (across 30 subjects) for each region are shown for MAPER (top) and FreeSurfer (bottom). Regions are colour coded by lobe: red – temporal lobe, orange – insula & cingulate, yellow – frontal lobe, green – occipital lobe, blue – parietal lobe, purple – central structures, pink – posterior fossa & ventricles. The top and bottom edges of the boxes are the 25<sup>th</sup> and 75<sup>th</sup> percentiles, the target inside each box is the median and outliers are indicated by unfilled circles on either end of the box whiskers. Abbreviations: L = left, R = right, gyr. = gyrus, cort. = cortex, ant. = anterior, post. = posterior, sup. = superior, inf. = inferior, med. = medial, lat. = lateral, temp. = temporal.

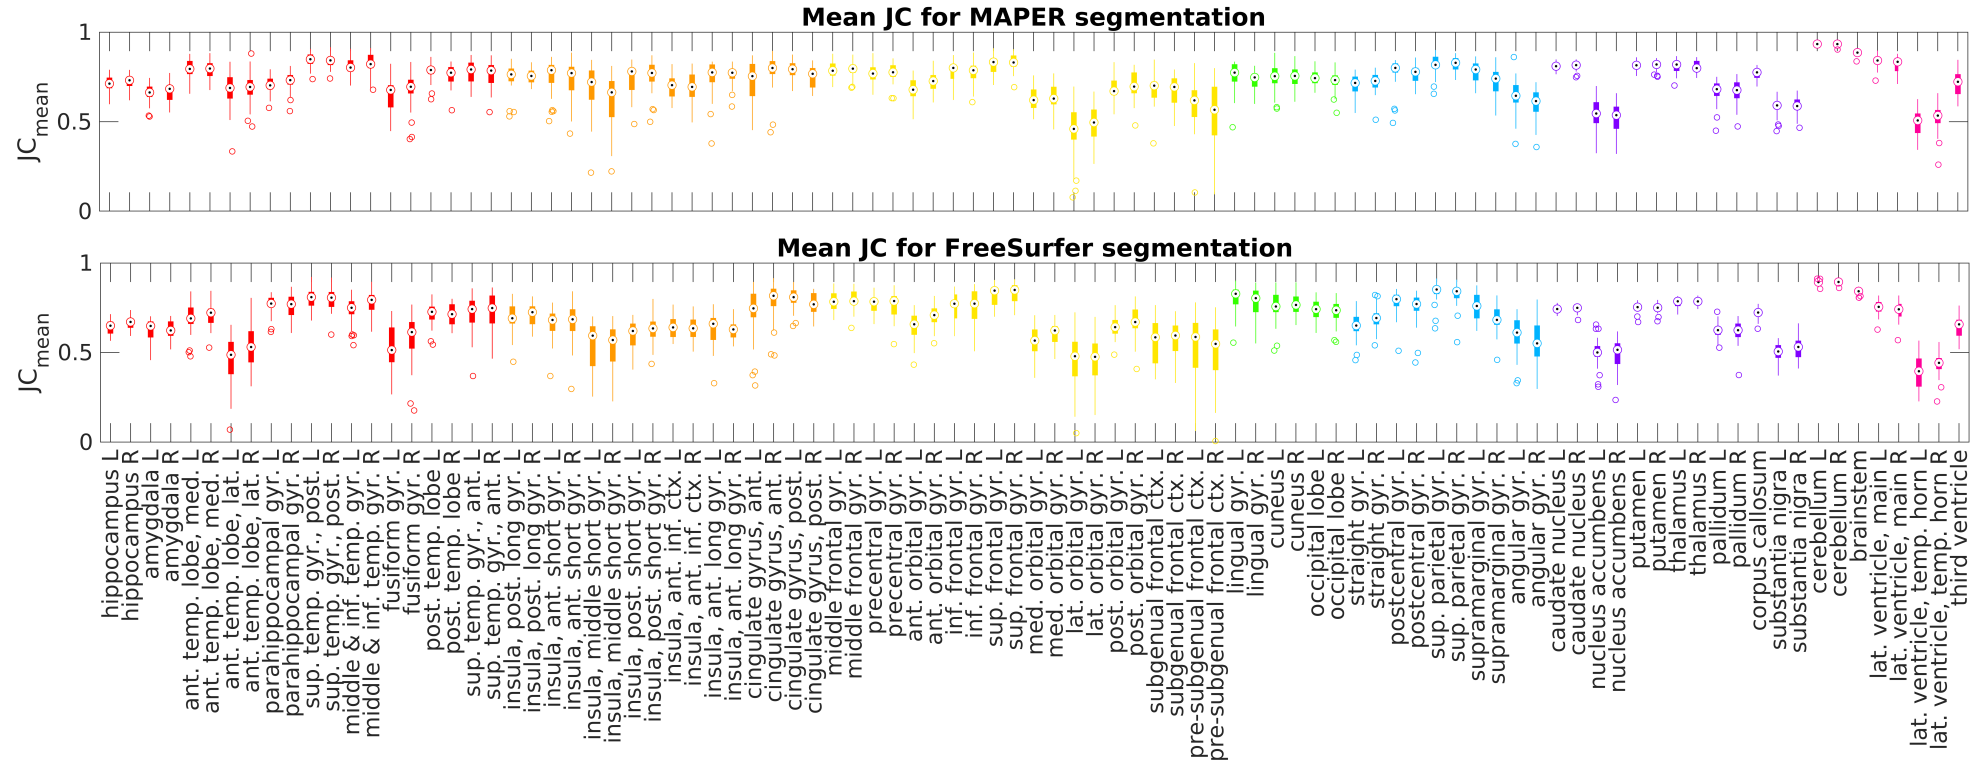

**Supplementary Figure S2.** Boxplots of Jaccard overlaps for the DKT40 atlas database.

Boxplots of JC (across 30 subjects) for each region are shown for MAPER (top) and FreeSurfer (bottom). Plot colours and abbreviations as in Supplementary Figure 1.

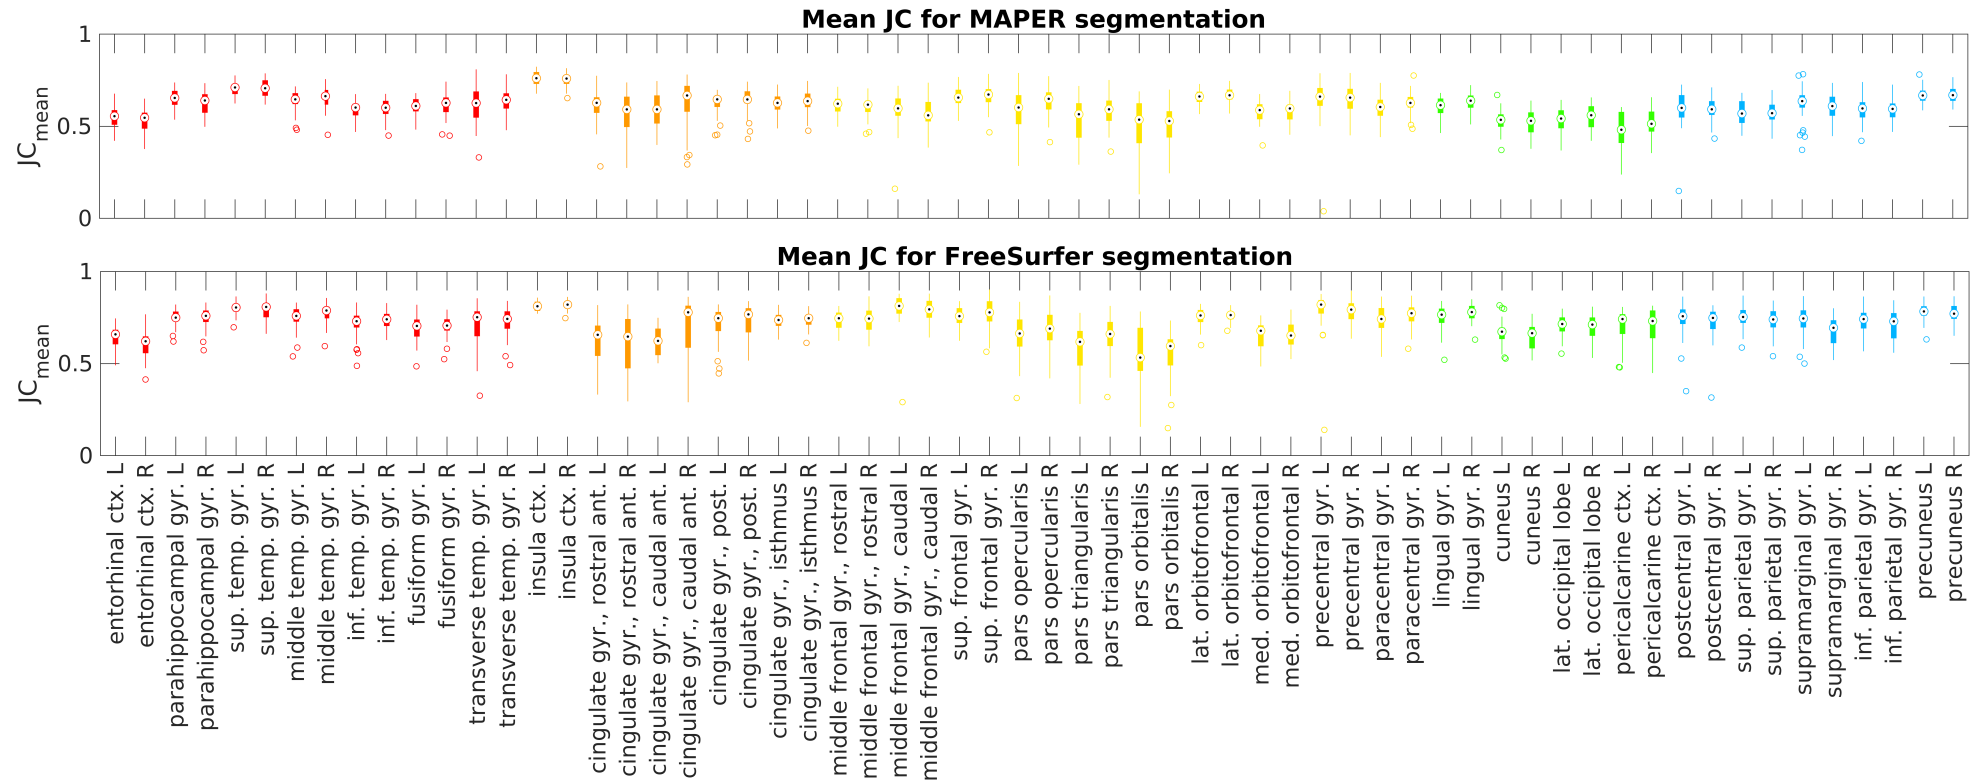

### Supplementary Figure S3. Boxplots of Jaccard overlap for the MGC2012 atlas database.

Boxplots of JC (across 30 subjects) for each region are shown for MAPER (top) and FreeSurfer (bottom). Plot colours and abbreviations as in Supplementary Figure 1.

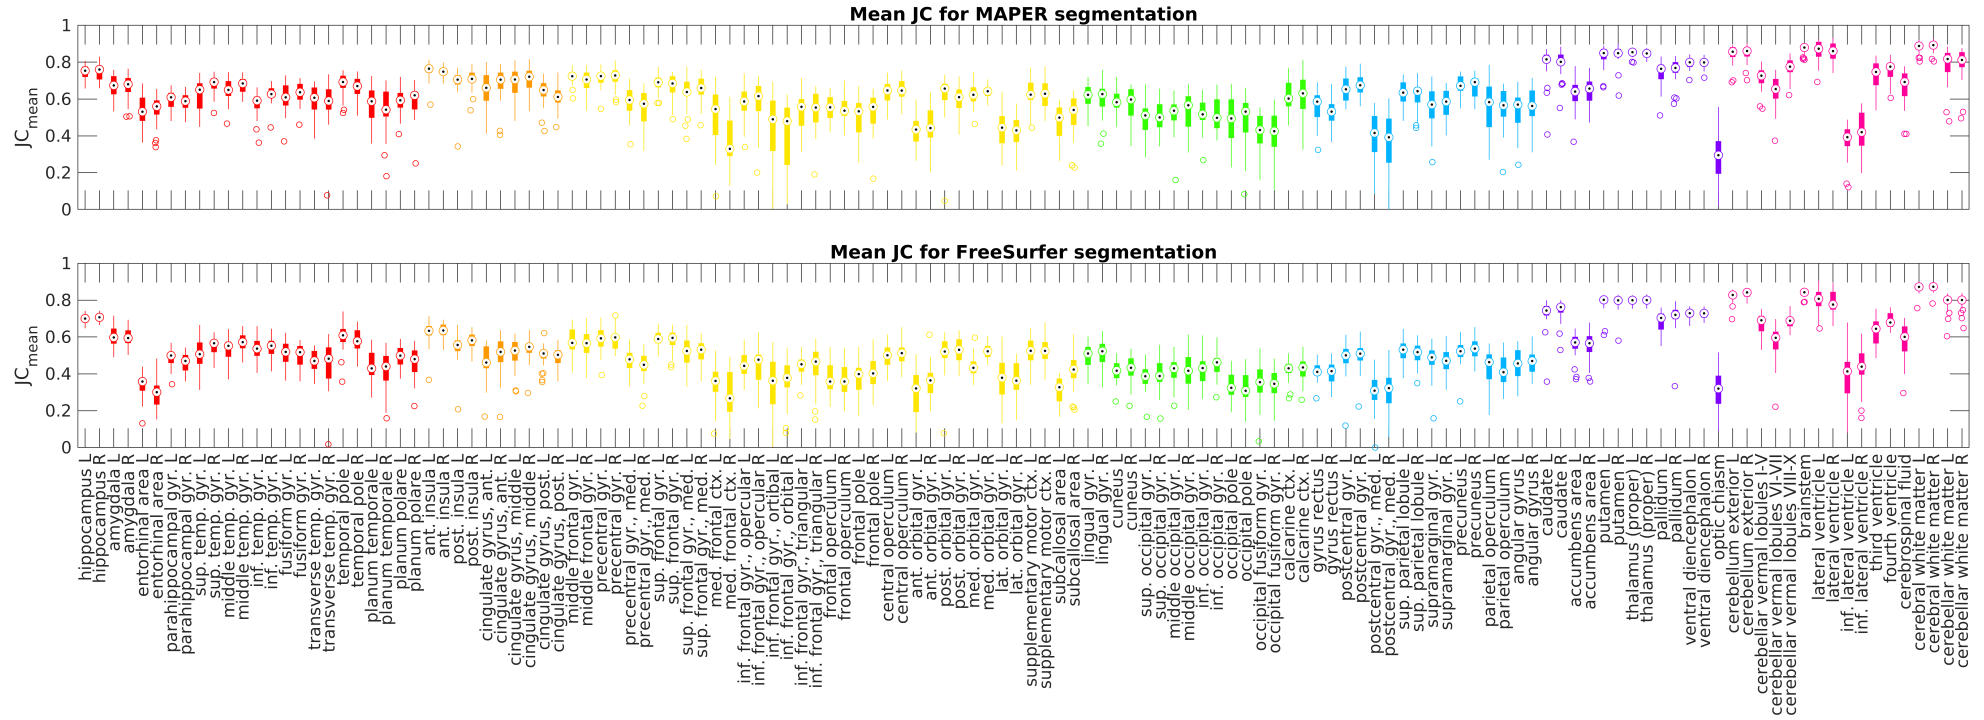

Supplement: 41598_2020_57951_MOESM1_ESM.pdf [file 41598_2020_57951_MOESM1_ESM.pdf]
